# Supplementary material for: Rhoifolin Alleviates Alcoholic Liver Disease In Vivo and In Vitro via Inhibition of the TLR4/NF-κB Signaling Pathway
Source: PubMed Central journal article supplement (PMC9171502; doi:10.3389/fphar.2022.878898), 2022-05-24
Supplement: DataSheet1.pdf [file DataSheet1.pdf]

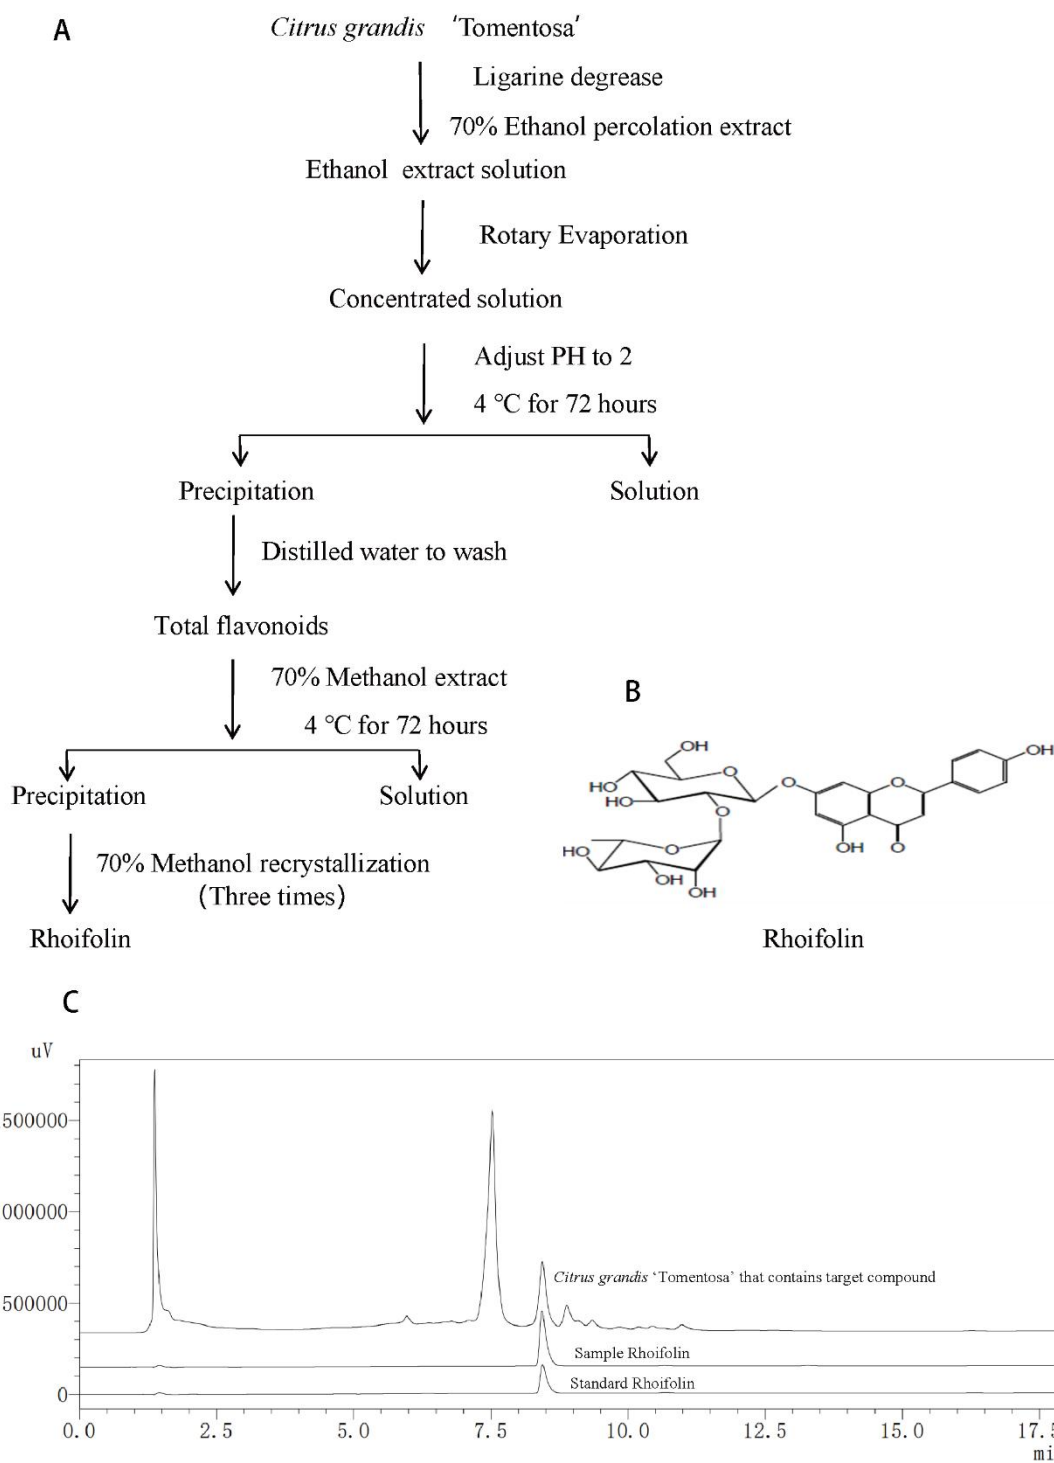

**Supplementary Figure 1.** Isolation of ROF from *Citrus grandis* 'Tomentosa': The flow chart of extraction and isolation of ROF (A), the chemical structure of ROF (B), and the Chromatograms of a standard ROF, sample ROF and *Citrus grandis* 'Tomentosa' that contains target compound (254 nm) (C).

A

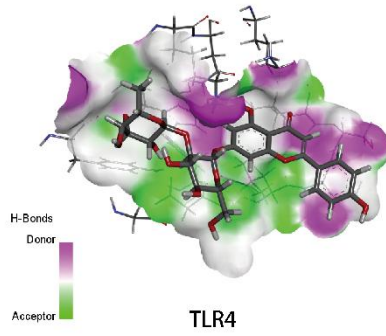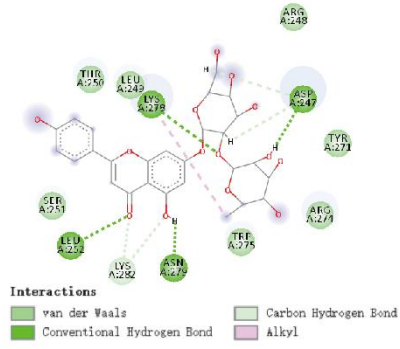

B

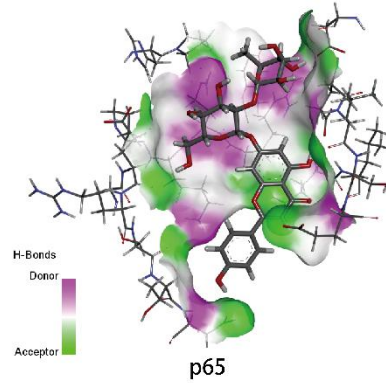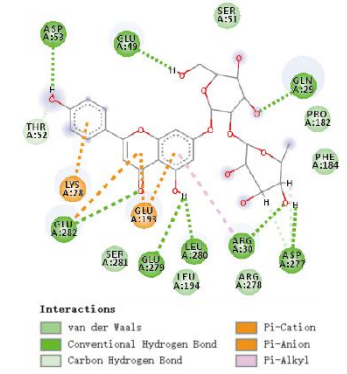

C

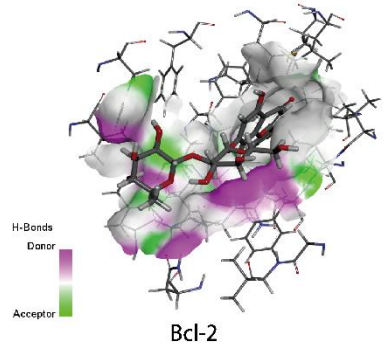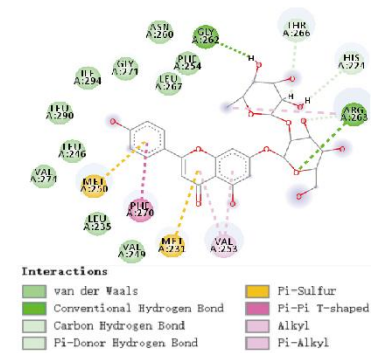

D

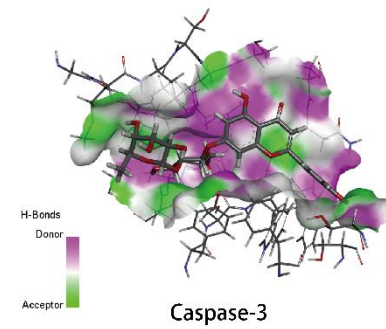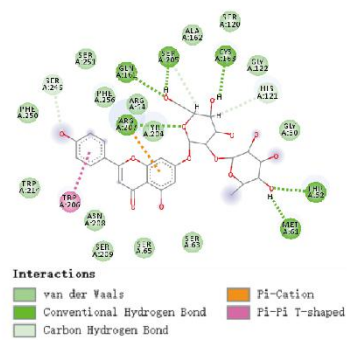

E

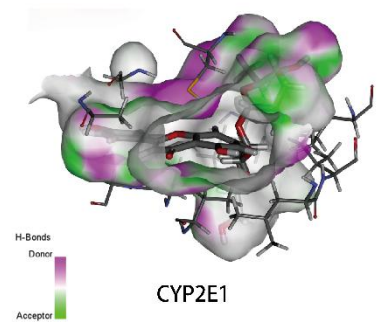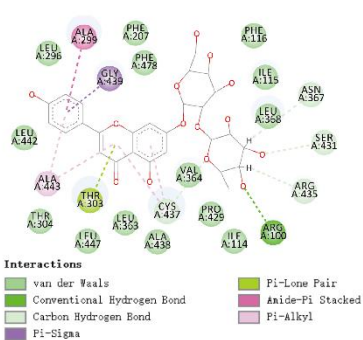

**Supplementary Figure 2.** Bioactive compound–protein docking combination: (A)TLR4, (B)p65, (C)Bcl-2, (D)Caspase-3, (E) CYP2E1.

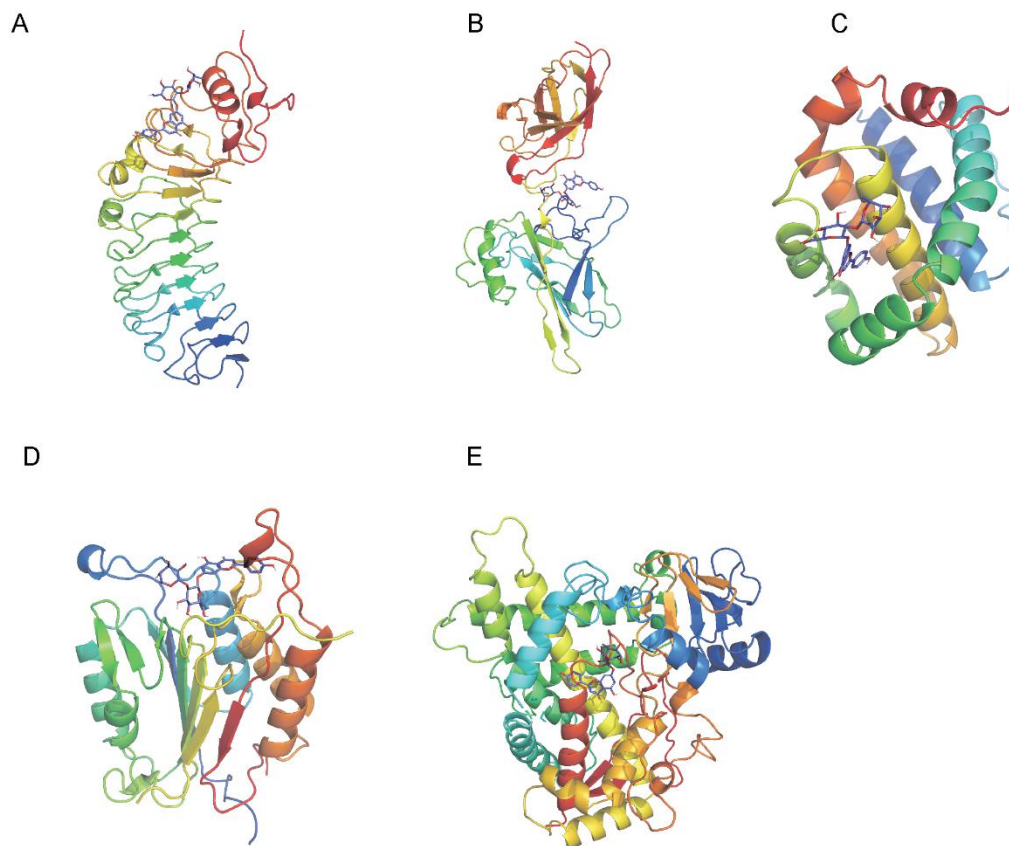

**Supplementary Figure 3.** Bioactive compound–protein docking combination (3D binding structure): (A)TLR4, (B)p65, (C)Bcl-2, (D)Caspase-3, (E) CYP2E1.

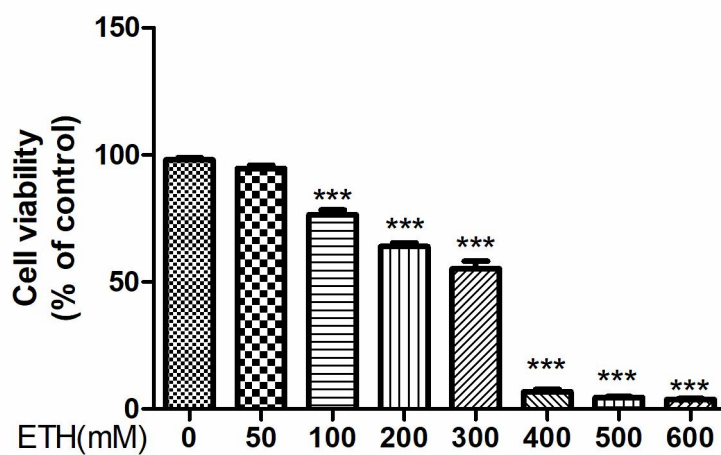

**Supplementary Figure 4.** Effects of ethanol on cell apoptosis and viability. Mean  $\pm$  SEM (n=6).

\*\*\* $P$ <0.001 vs. the CON group.
