# Supplementary material for: Rhoifolin Alleviates Alcoholic Liver Disease In Vivo and In Vitro via Inhibition of the TLR4/NF-κB Signaling Pathway
Source: PubMed Central journal article supplement (PMC9171502; doi:10.3389/fphar.2022.878898), 2022-05-24
Supplement: DataSheet2.pdf [file DataSheet2.pdf]

# Supplementary Figure

## Original Gels

In Figure.3

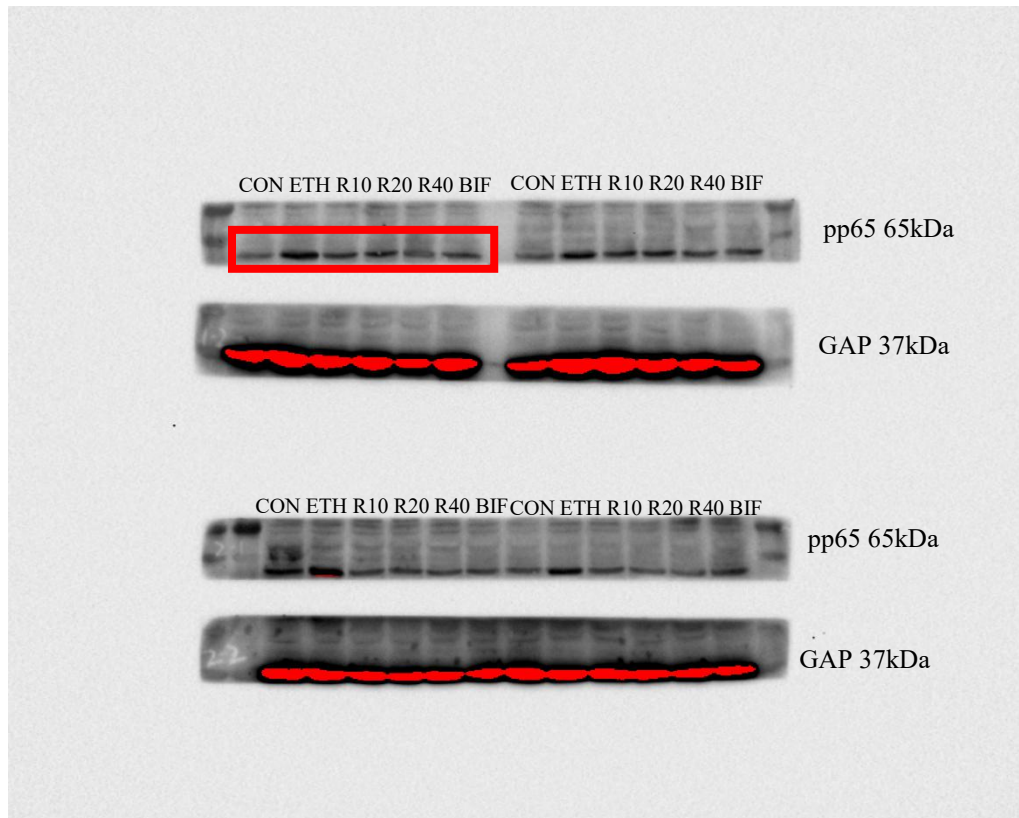

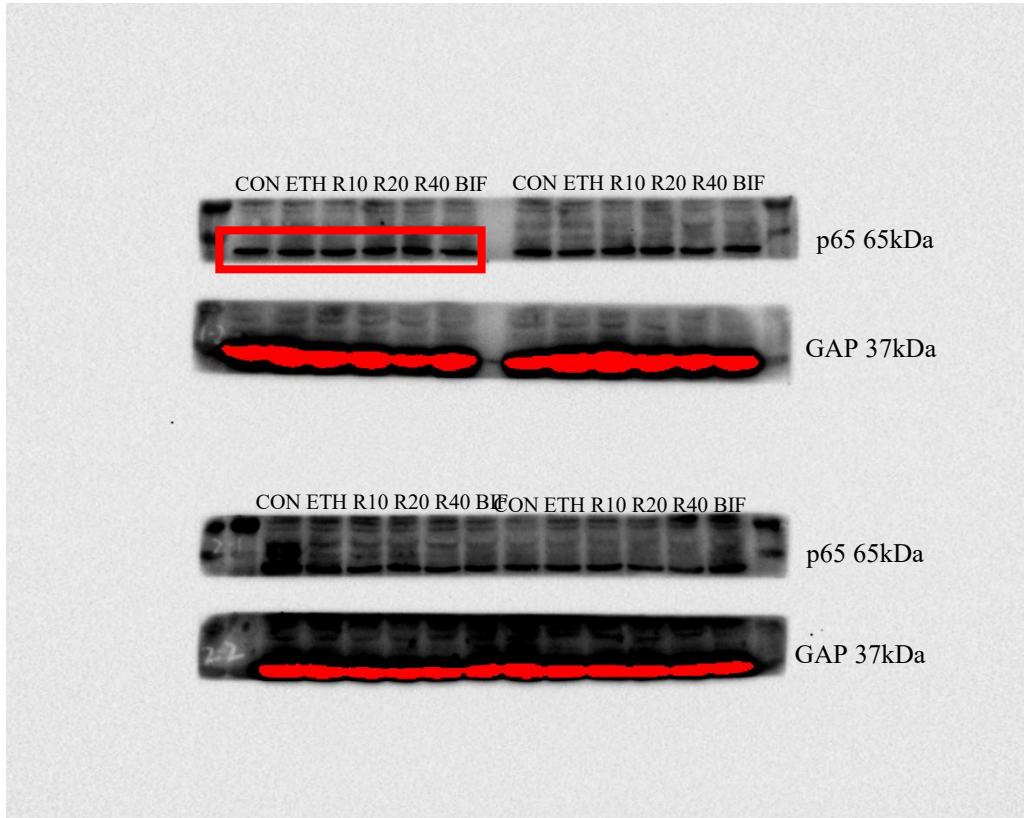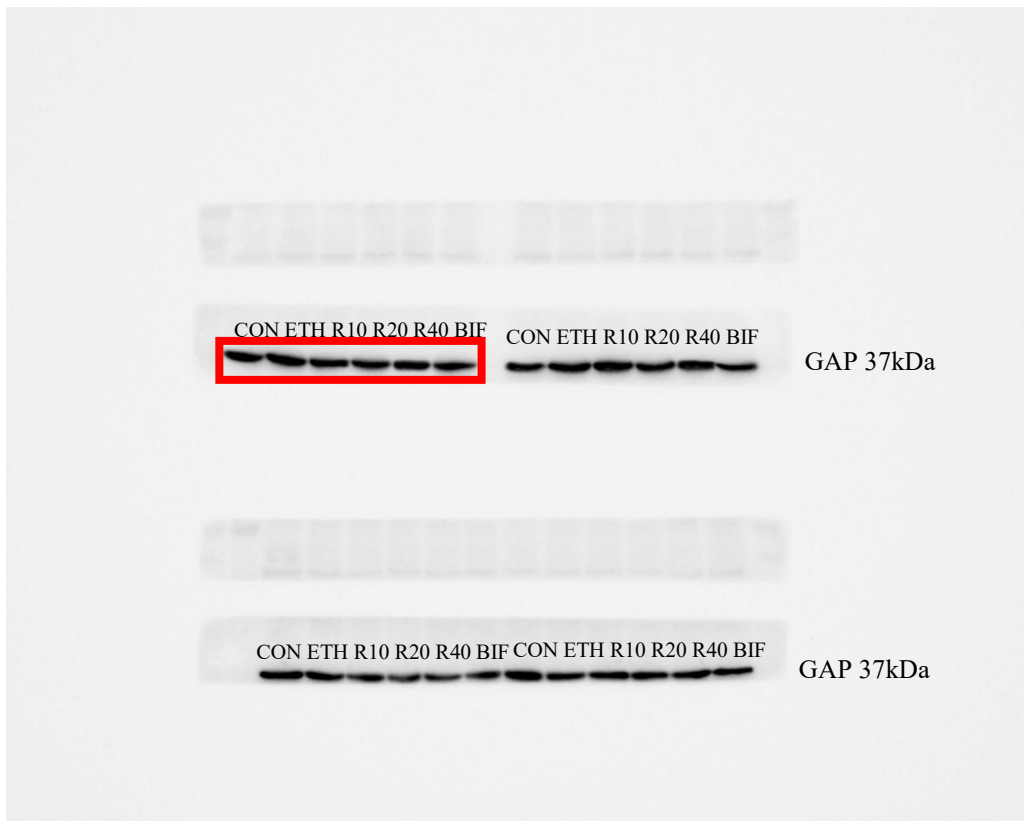

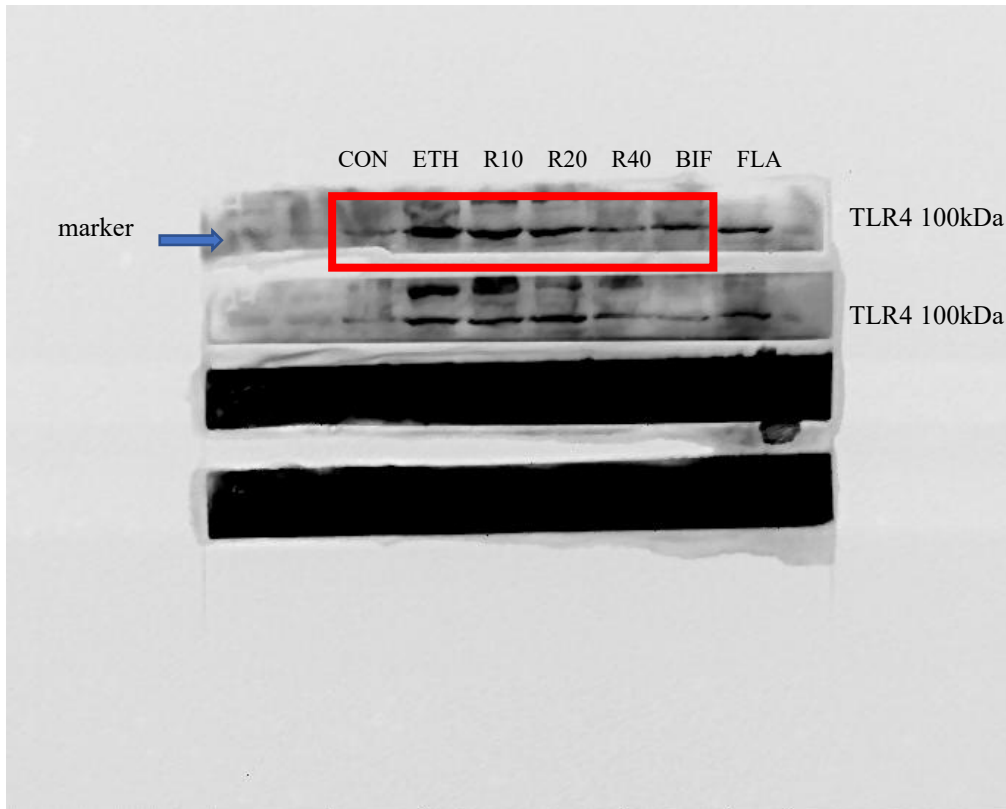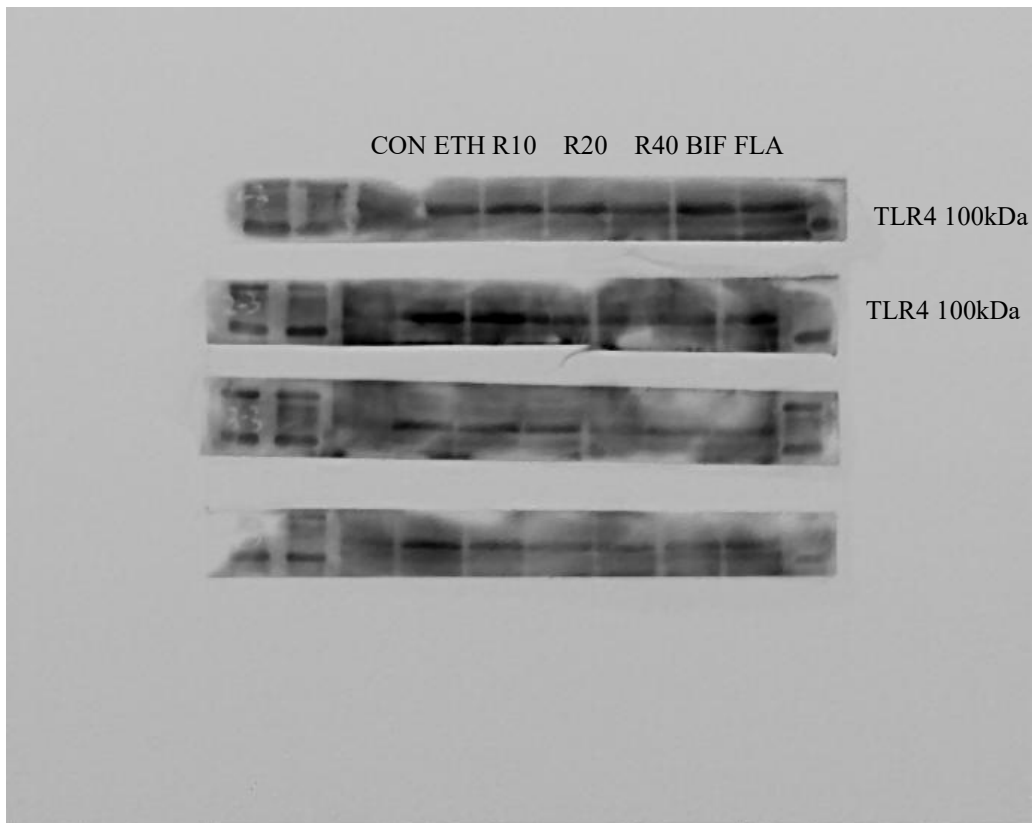

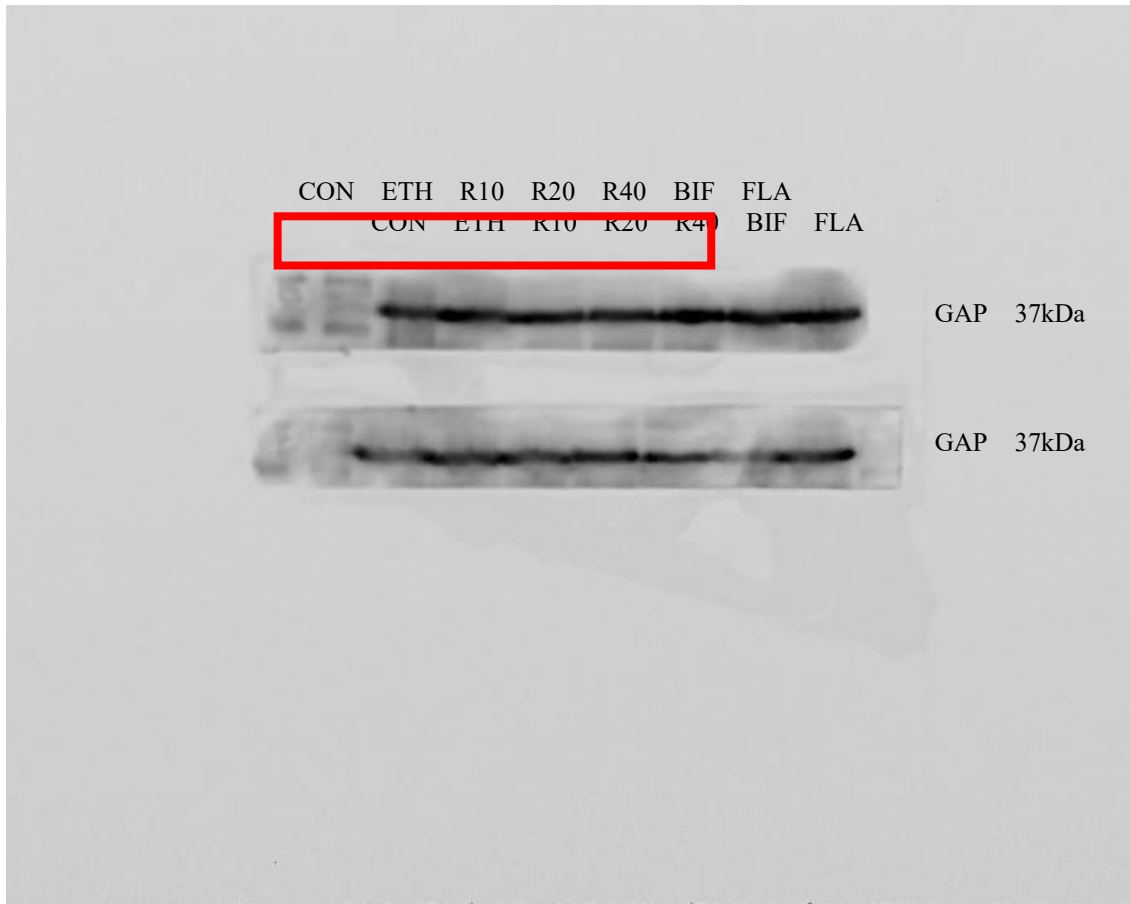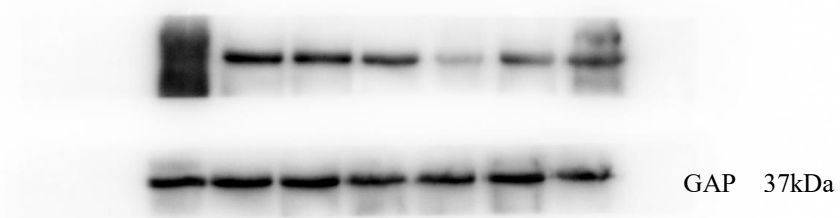

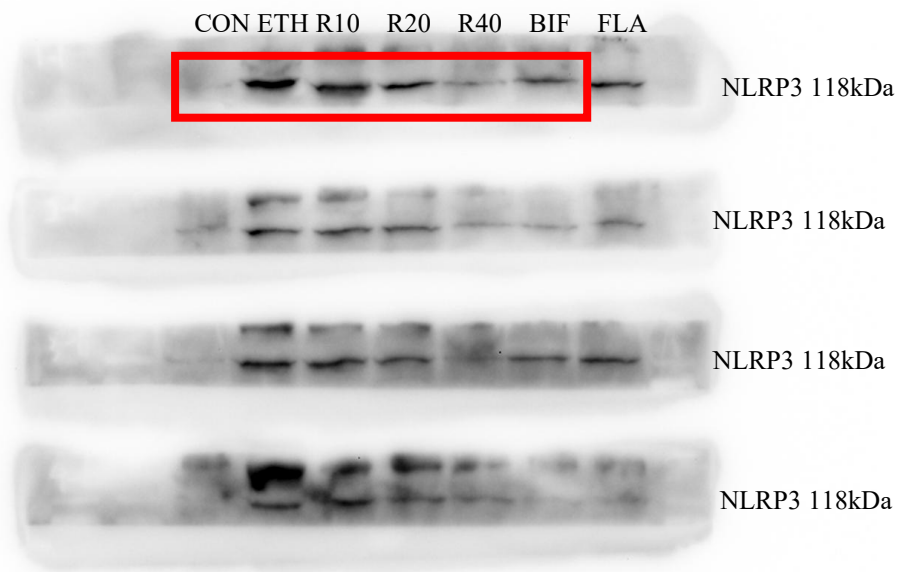

**In Figure.4**

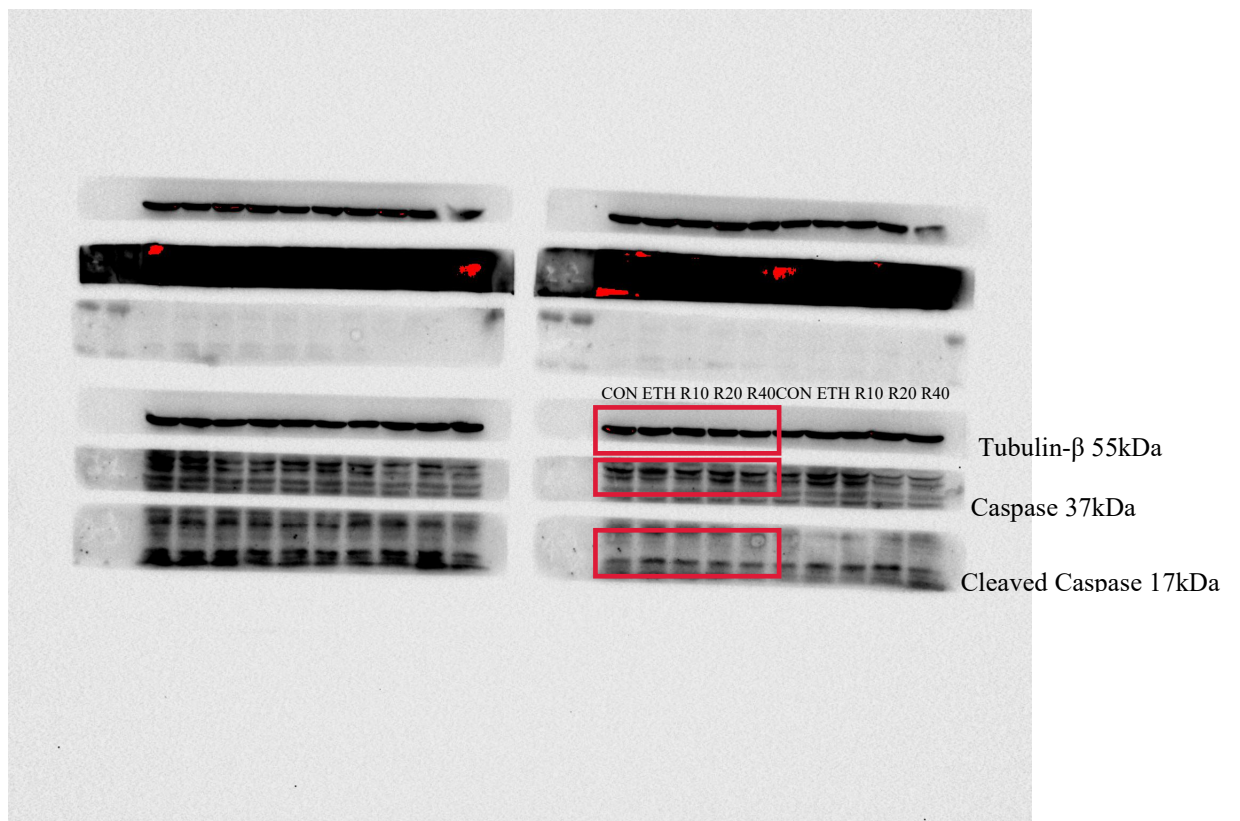

**In Figure.6**

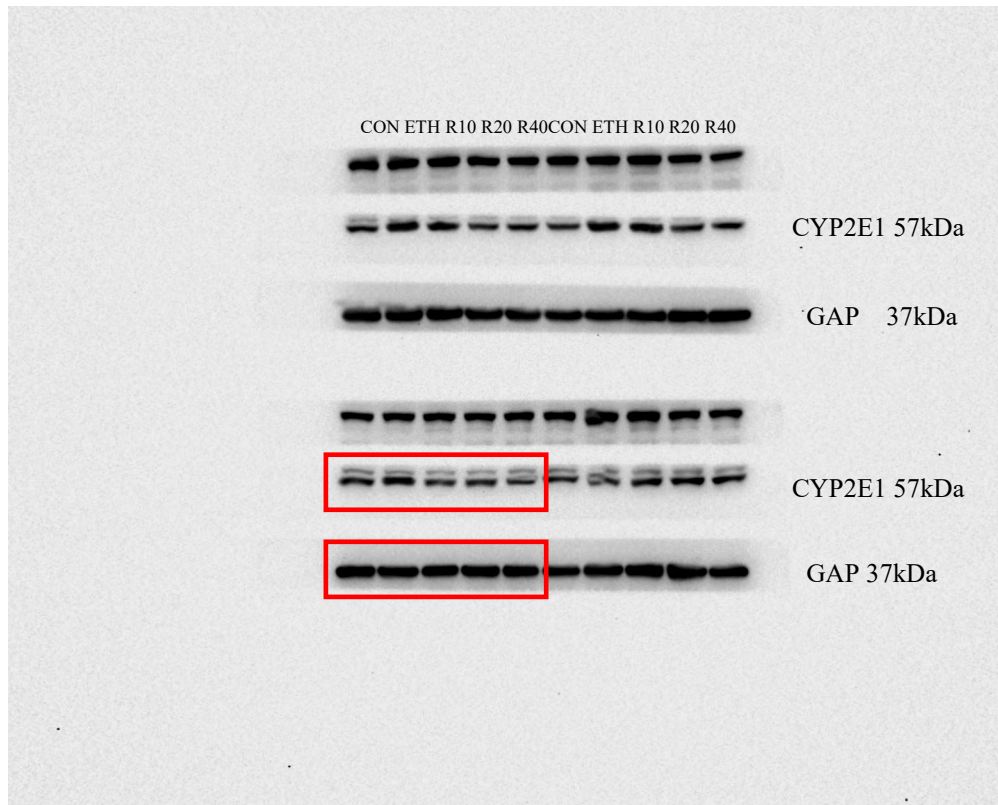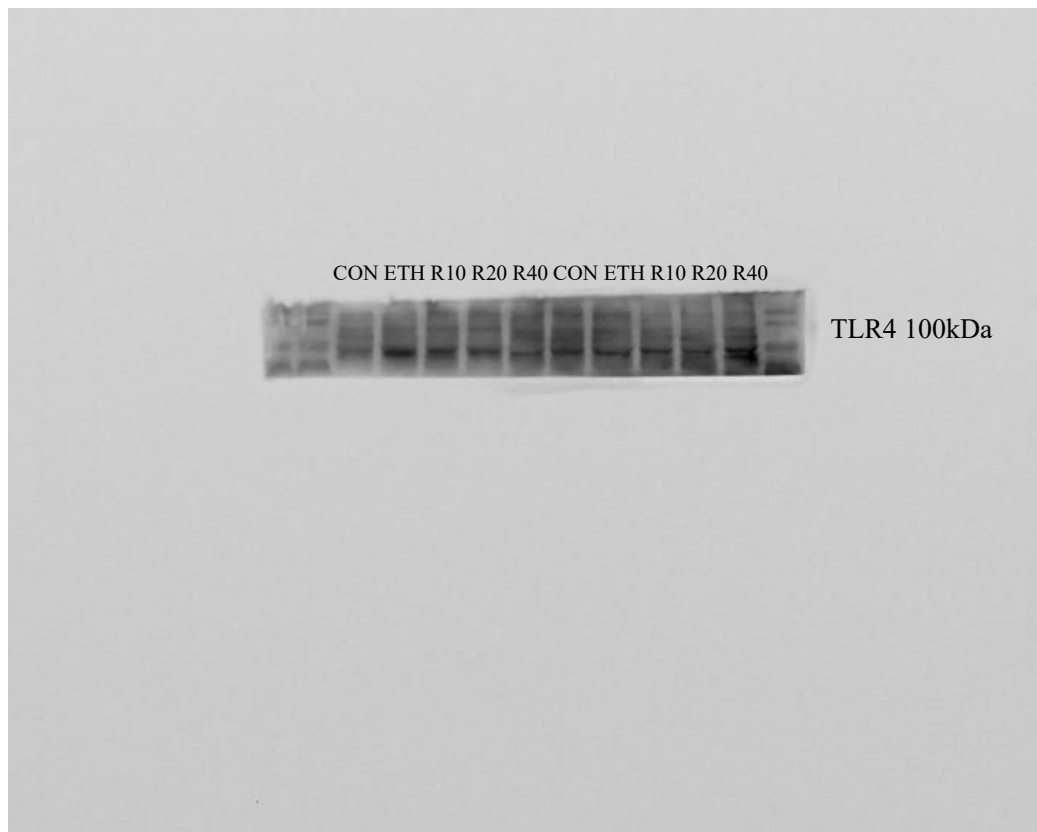

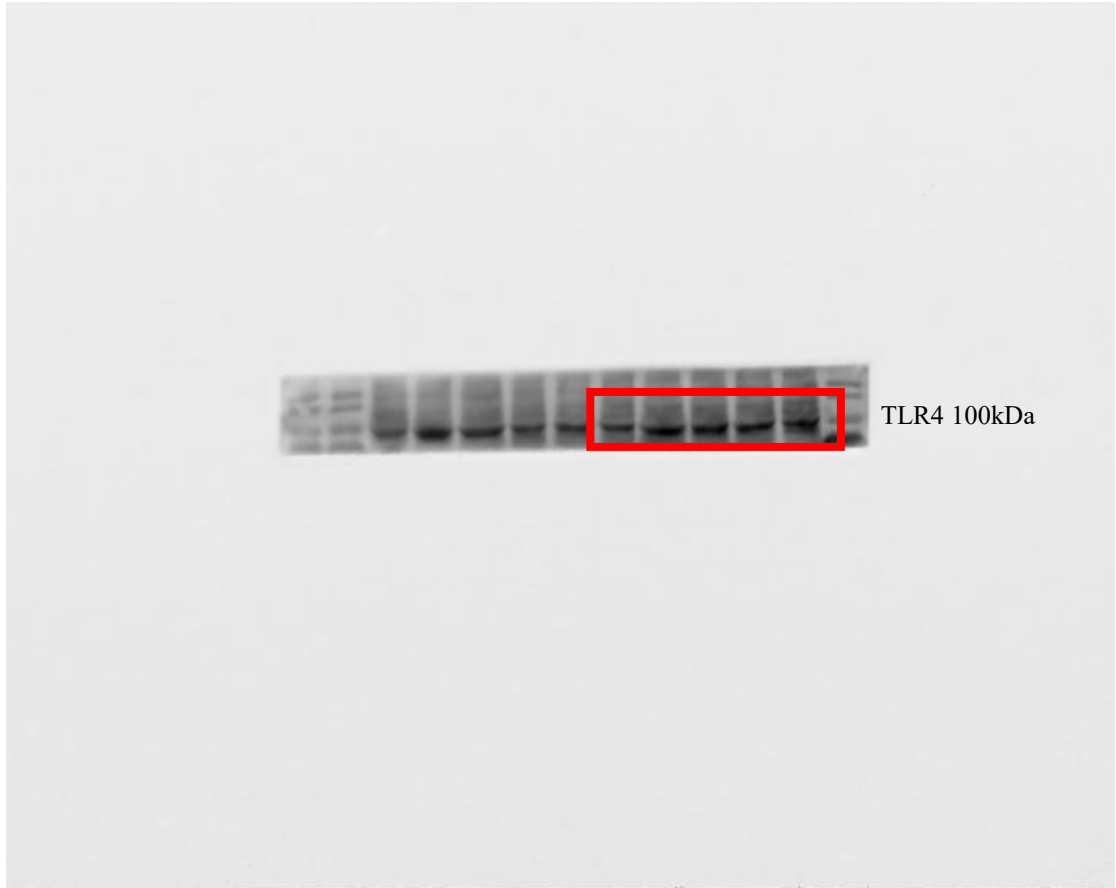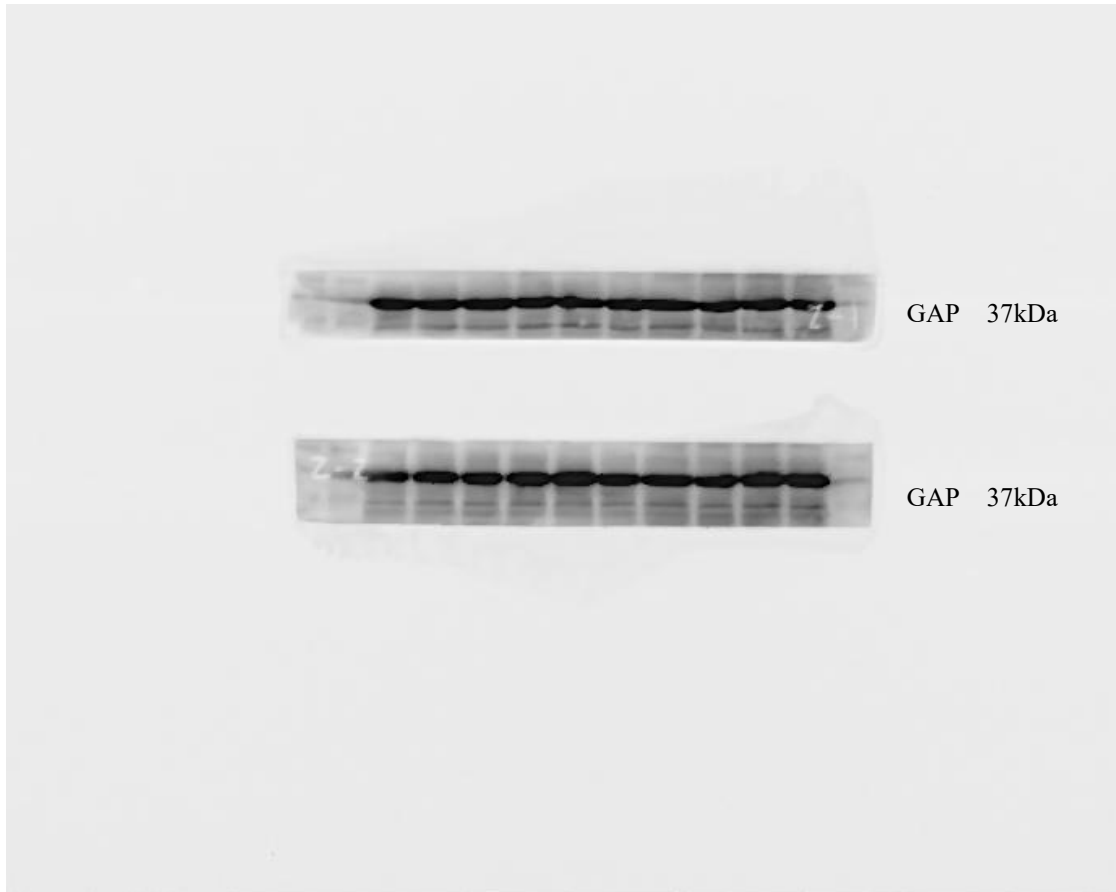



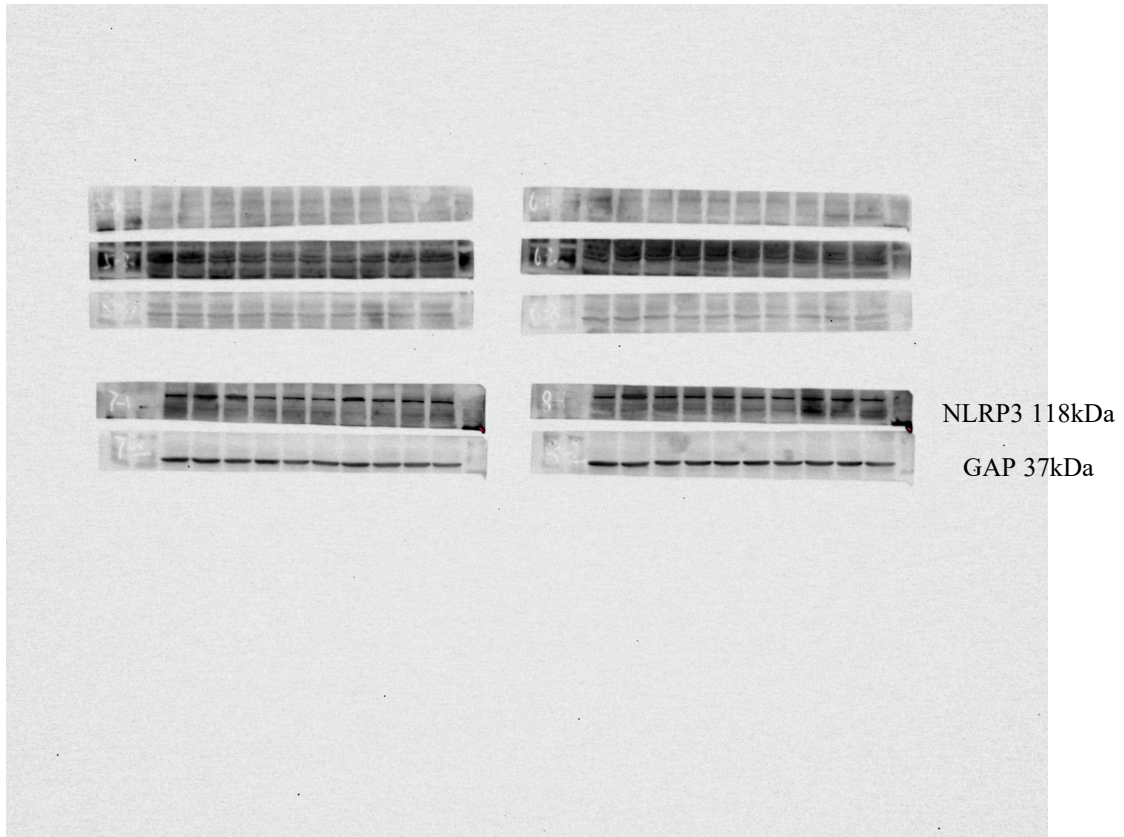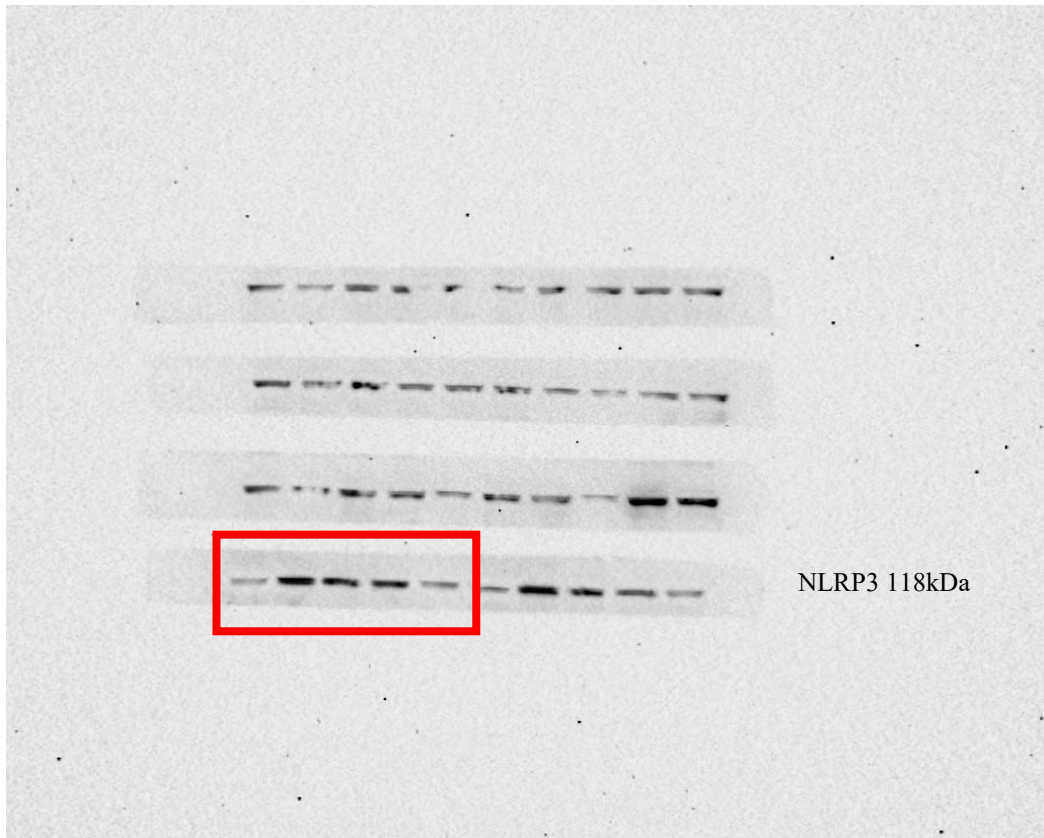



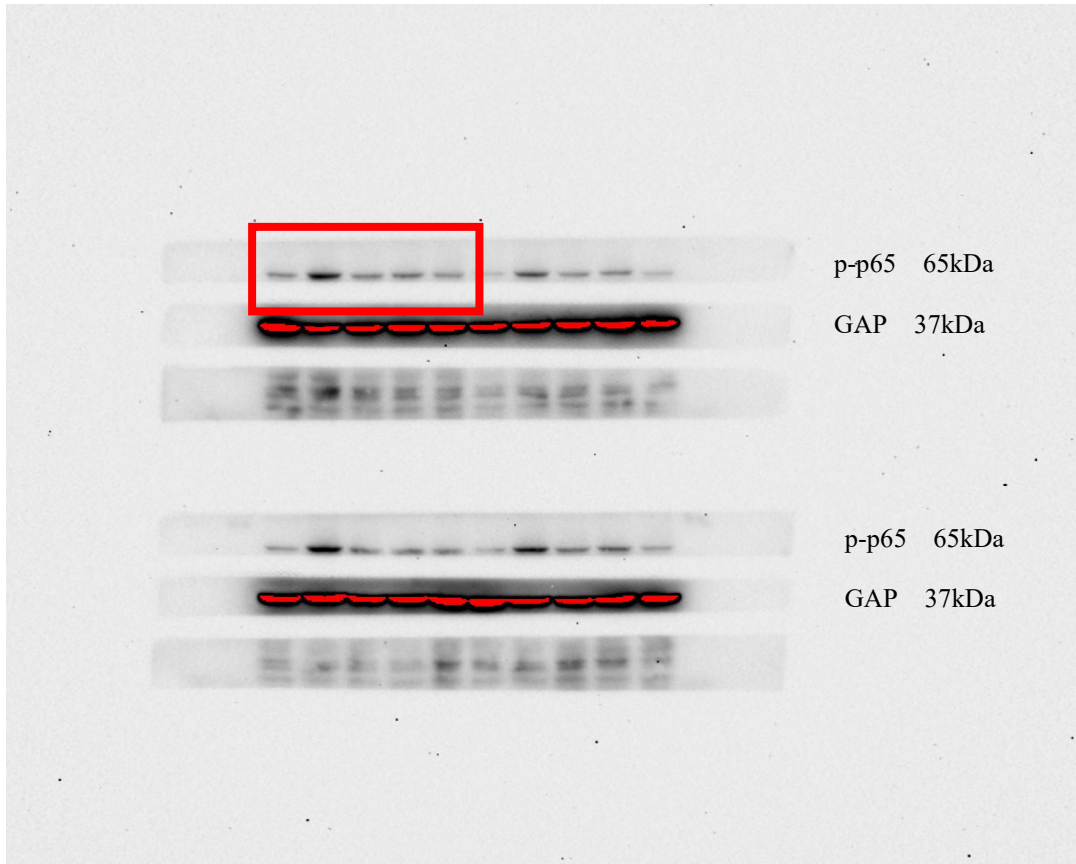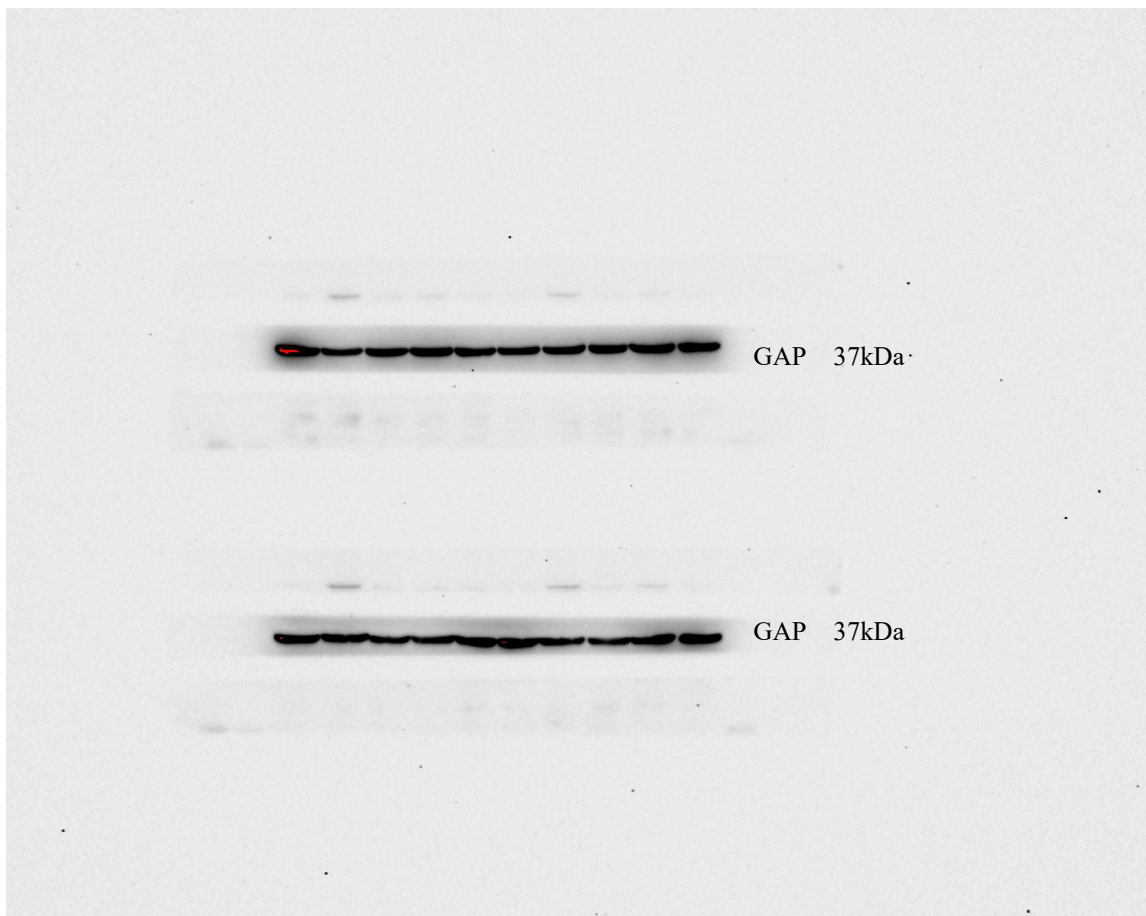

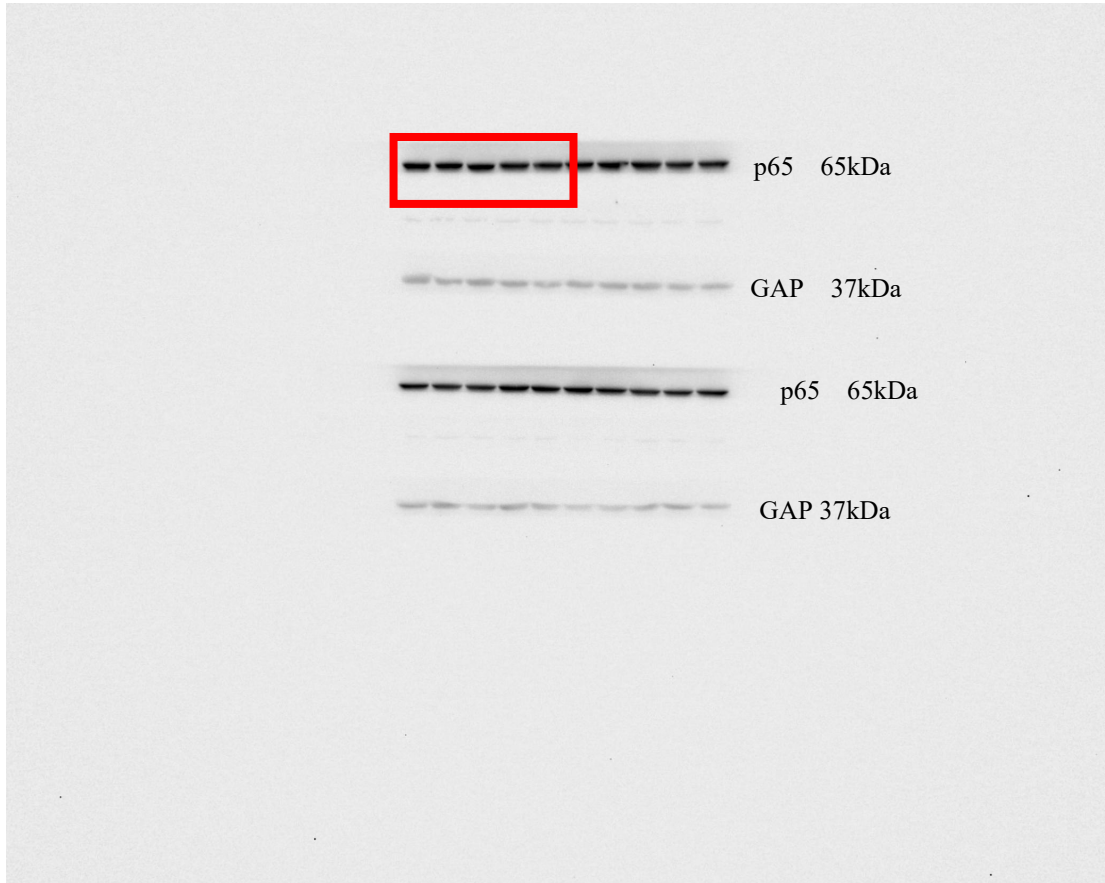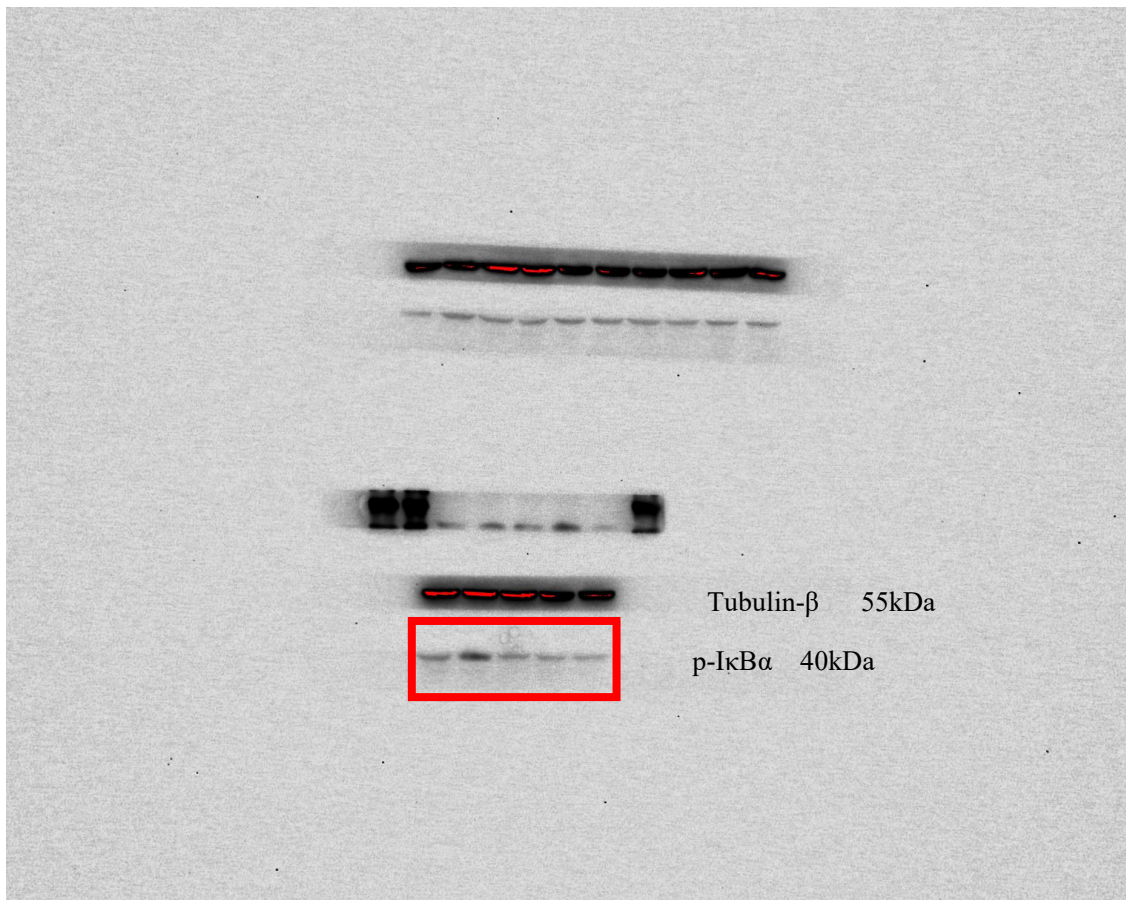

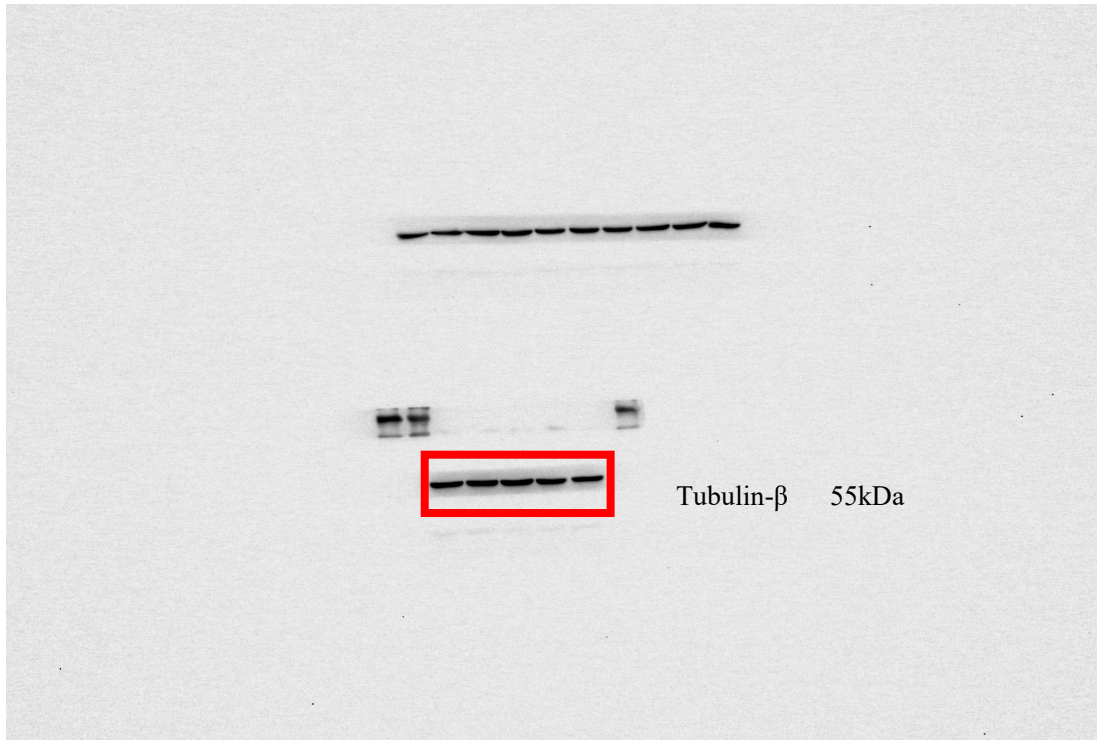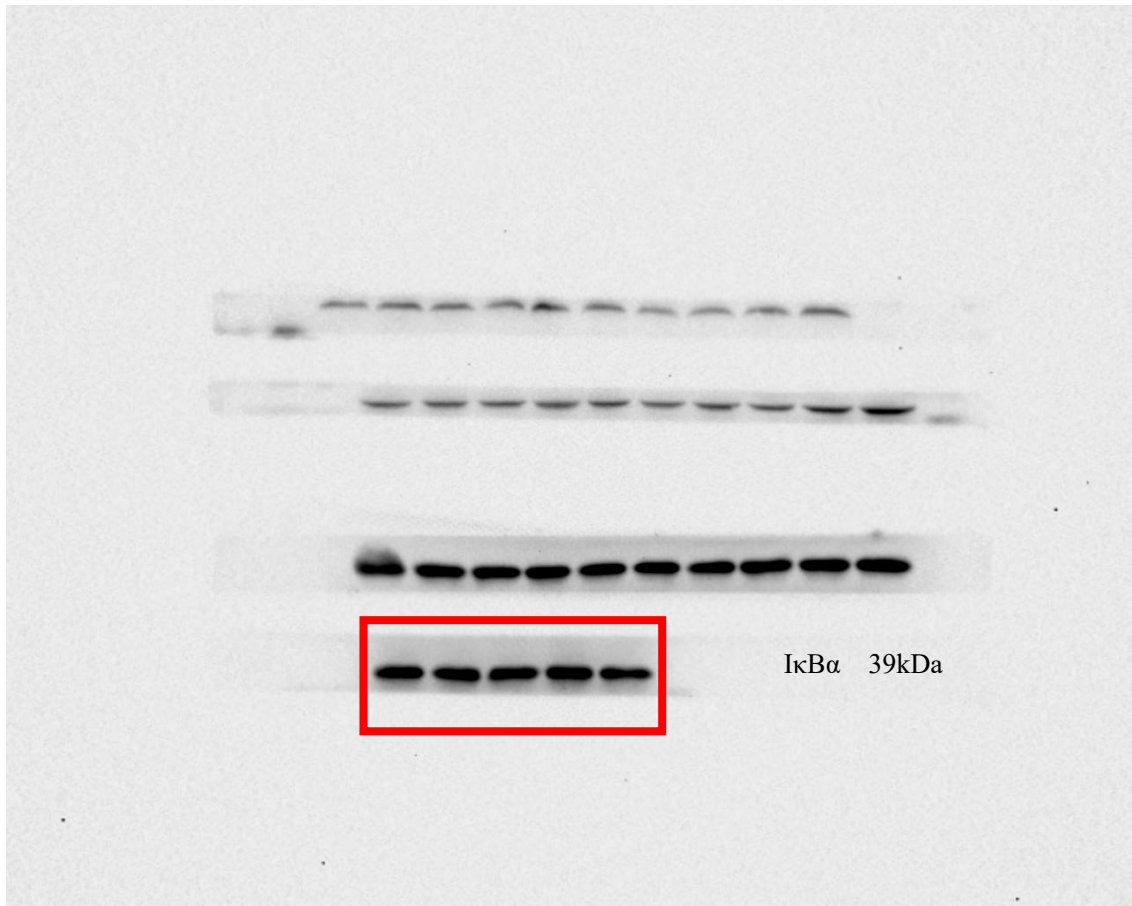



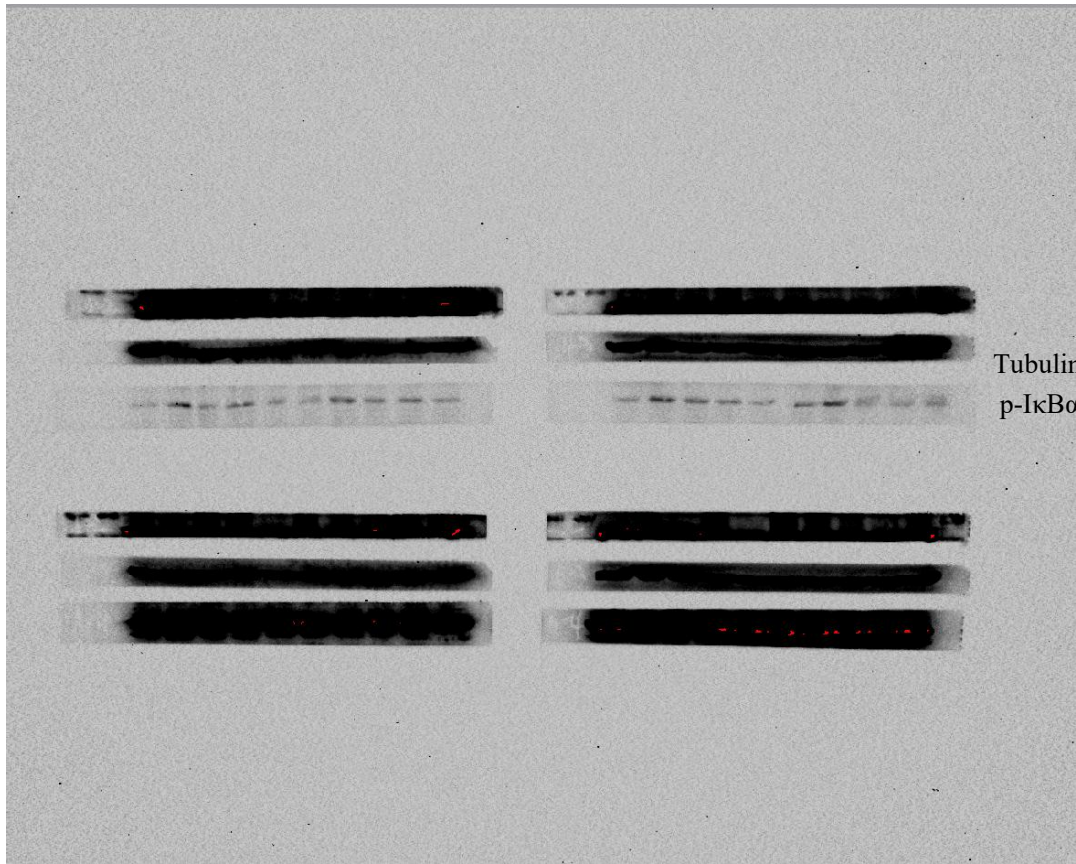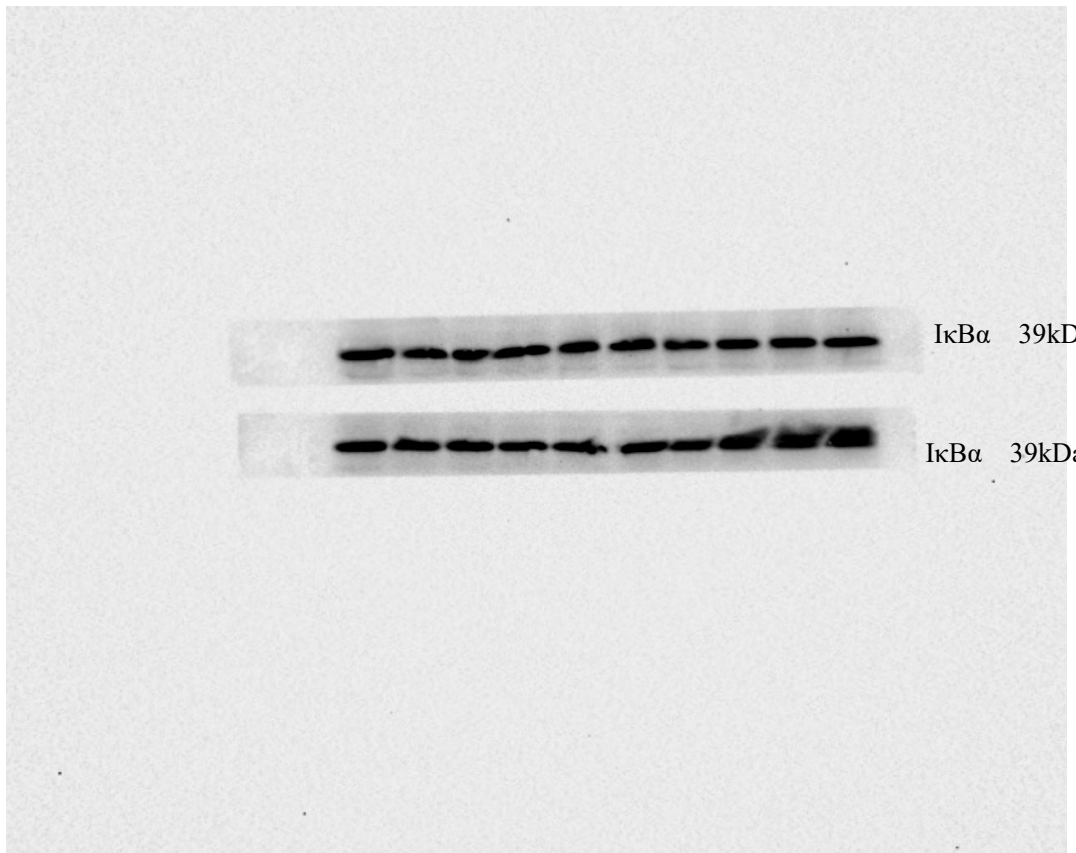

# Original Files for Microscopy Images

HE (X200)

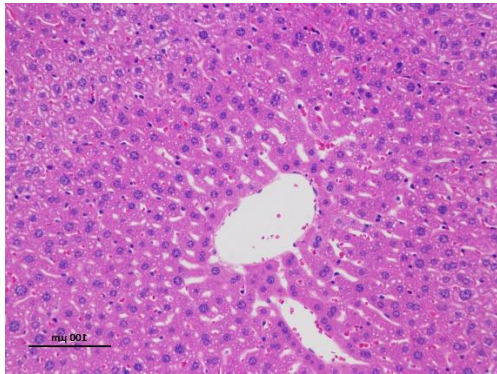

CON

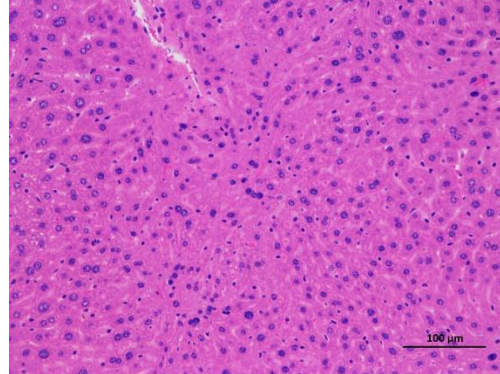

ETH

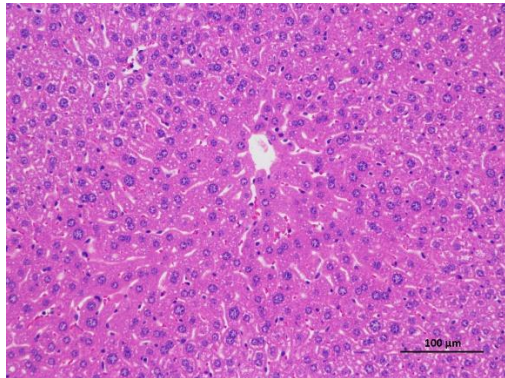

ROF10

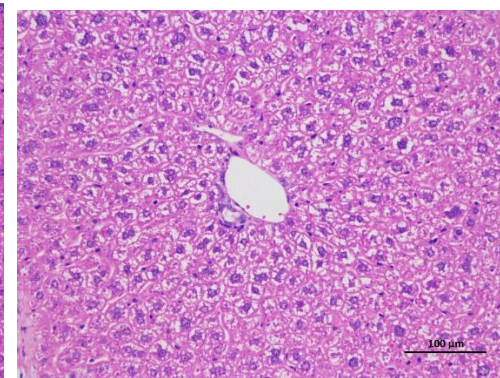

ROF20

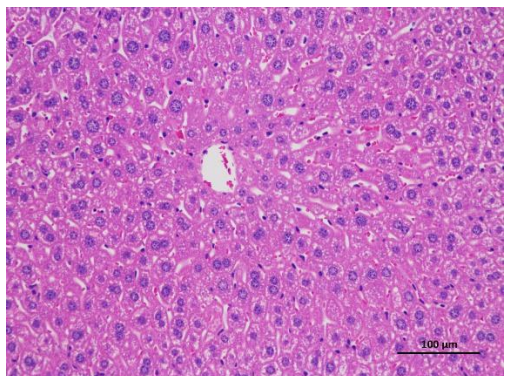

ROF40

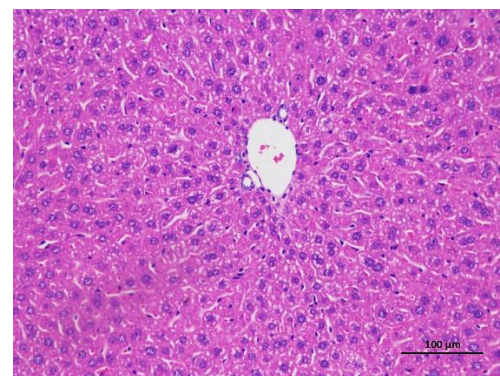

BIF



**HE (X400)**

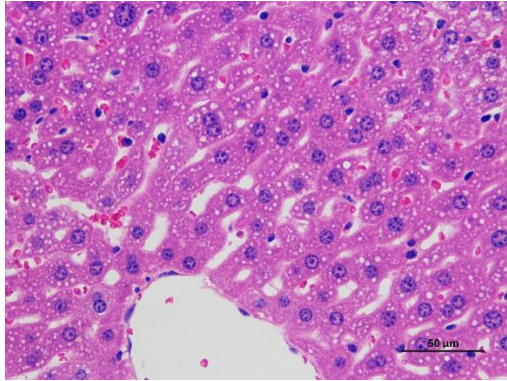

CON

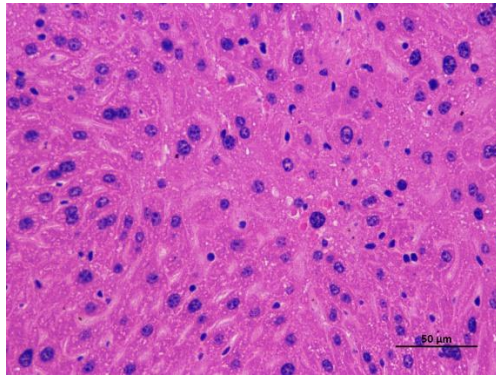

ETH

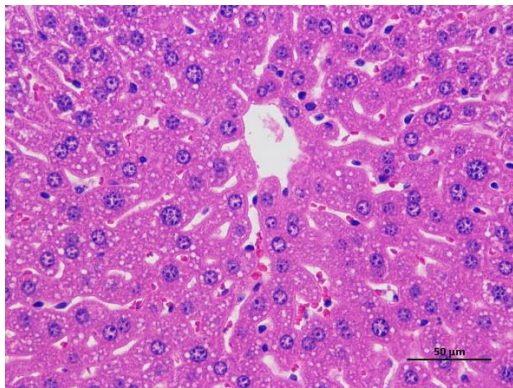

ROF10

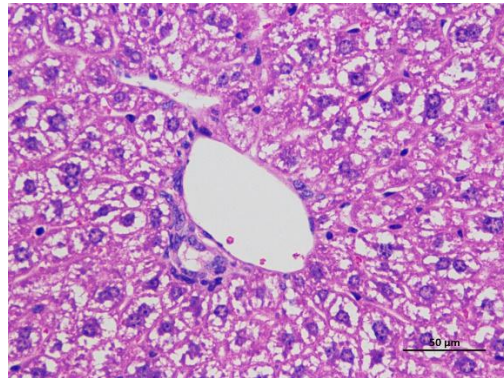

ROF20

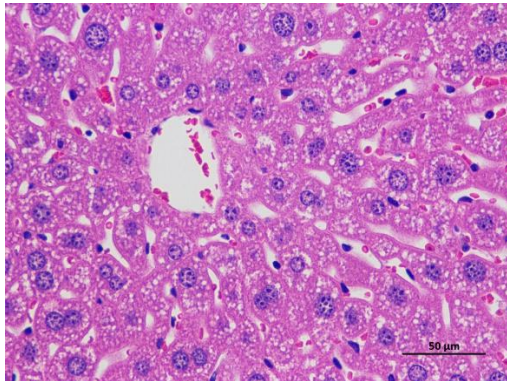

ROF40

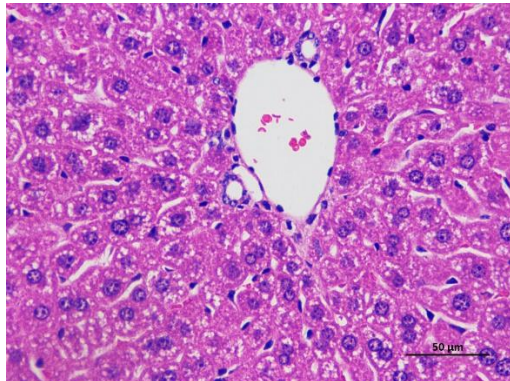

BIF



**IHC-CYP2E1 (X200)**

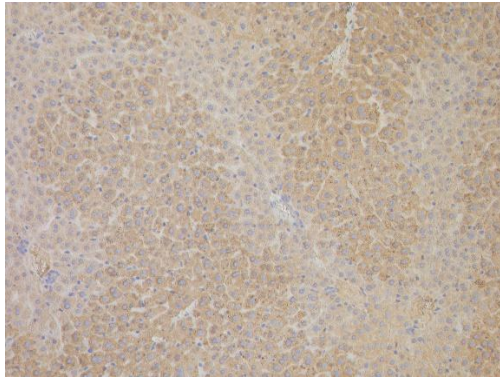

CON

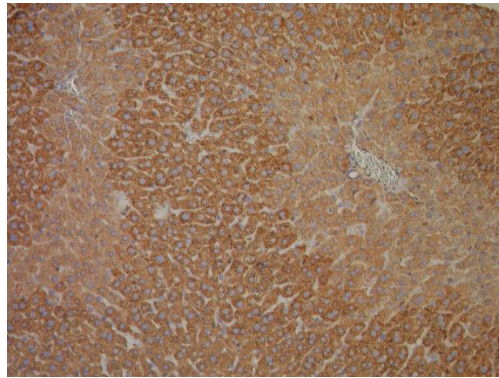

ETH

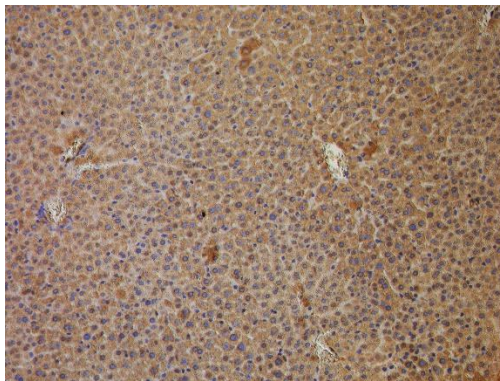

ROF10

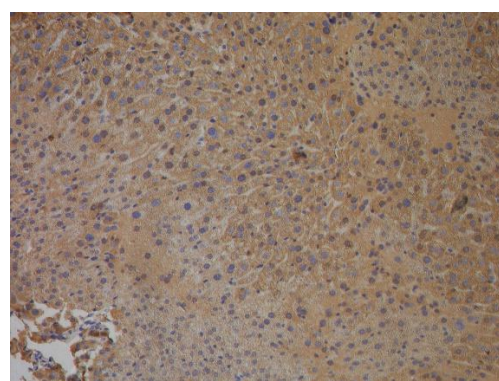

ROF20

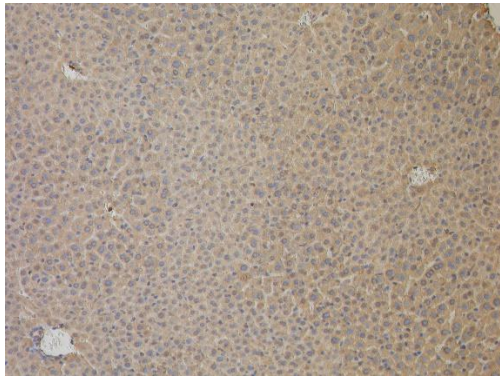

ROF40

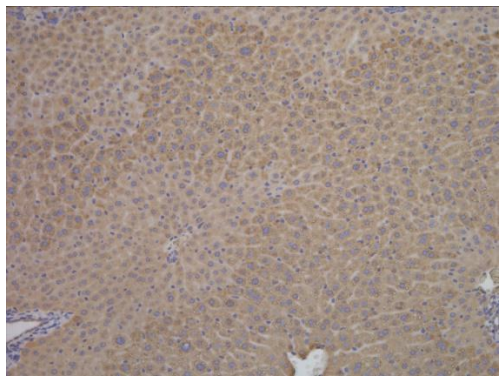

BIF

**IHC-p65 (X200)**

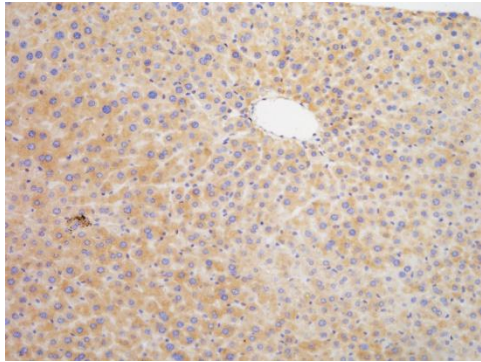

CON

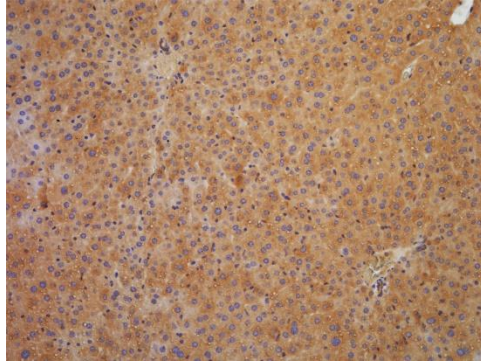

ETH

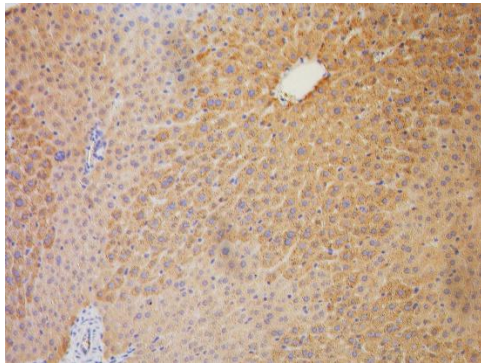

ROF10

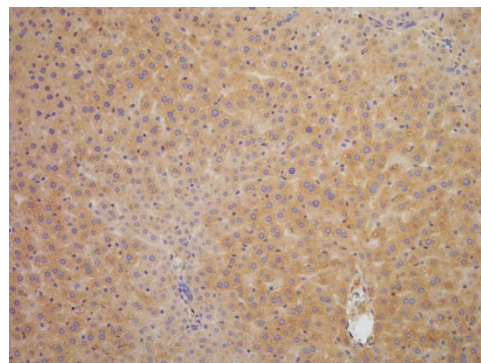

ROF20

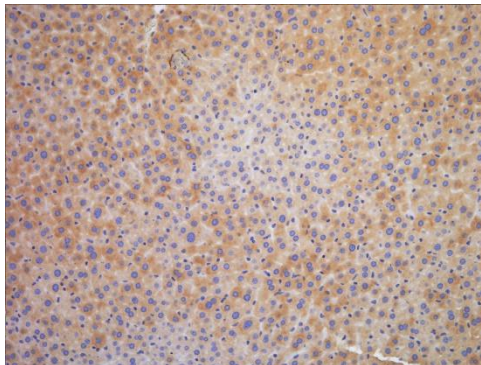

ROF40

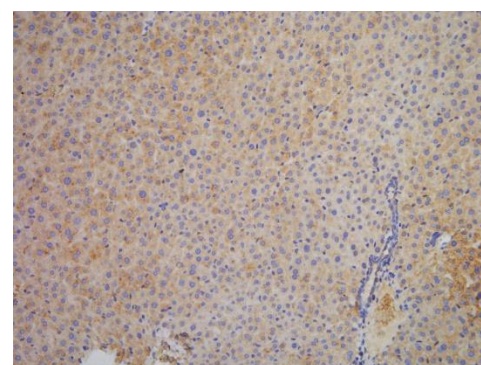

BIF



Institution: FC500  
Protocol: p i user2018 00008640 882.PRO  
Listmode Replay: Runtime Protocol  
Analysis Date: 19-Nov-2019, 17:07:48  
Settings File: PC9\_Annexin V-Pi.PRO, 19-Nov-2019, 16:09:34  
Listmode File: lo2-C user2018 00008647 889.LMD

Run Date: 19-Nov-19, 16:10:29  
Sample ID: lo2-C  
User ID: user2018  
Acquisition Time/Events: 15.4s / 10000 (PROTOCOL)  
Instrument SN: AM18110 Software Version: CXP 2.3

(F1)[Ungated] lo2-C user2018 00008647 889.LMD : SS Lin/FS Li

(F1)[A] lo2-C user2018 00008647 889.LMD : FL3 Log - ADC

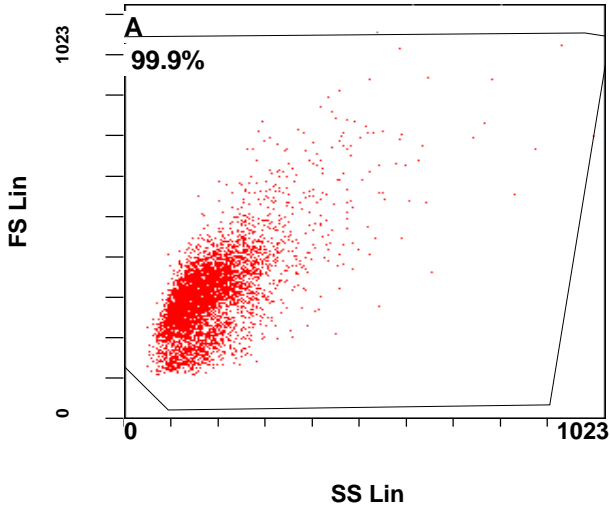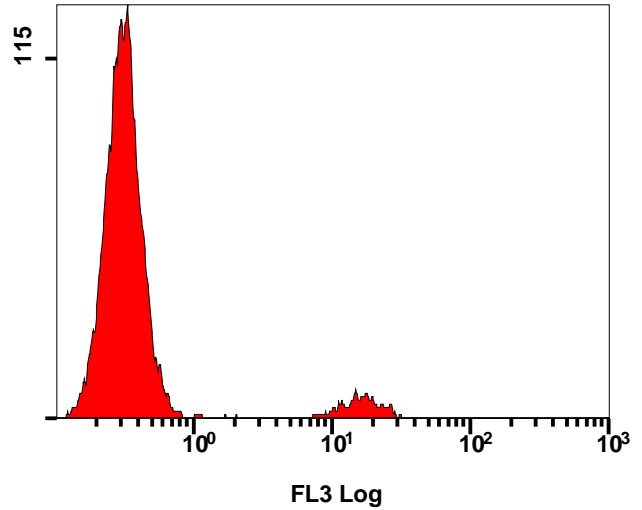

(F1)[A] lo2-C user2018 00008647 889.LMD : FL1 Log - AC(F1)[A] lo2-C user2018 00008647 889.LMD : FL1 Log/FL3 Log - ADC

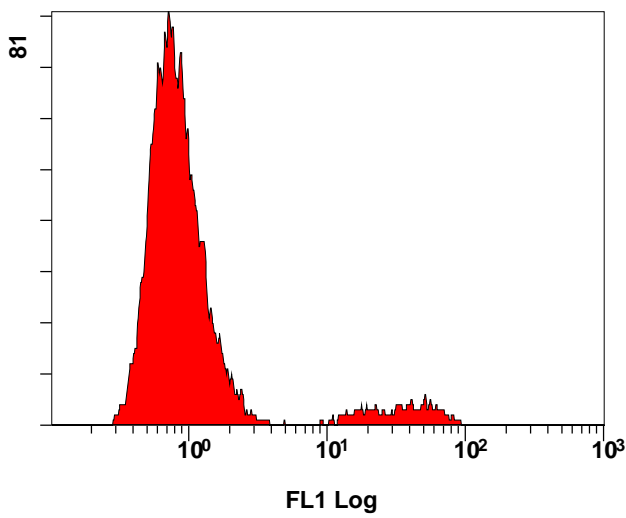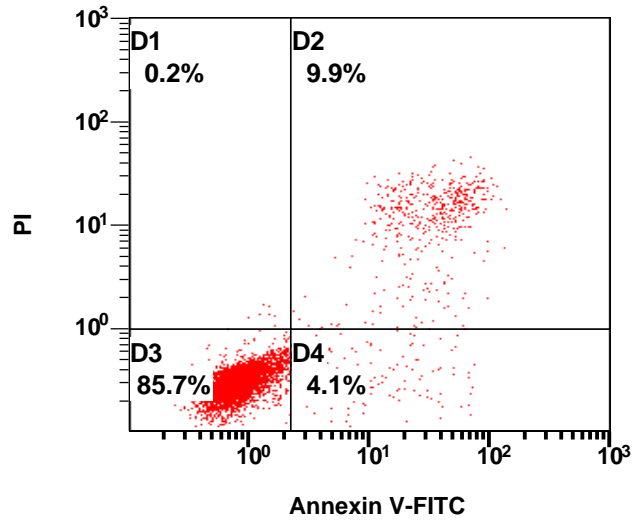

Institution: FC500  
Protocol: p i user2018 00008640 882.PRO  
Listmode Replay: Runtime Protocol  
Analysis Date: 19-Nov-2019, 17:08:41  
Settings File: PC9\_Annexin V-Pi.PRO, 19-Nov-2019, 16:10:44  
Listmode File: lo2-M user2018 00008648 890.LMD

Run Date: 19-Nov-19, 16:11:36  
Sample ID: lo2-M  
User ID: user2018  
Acquisition Time/Events: 18.2s / 10000 (PROTOCOL)  
Instrument SN: AM18110 Software Version: CXP 2.3

(F1)[Ungated] lo2-M user2018 00008648 890.LMD : SS Lin/FS Li (F1)[A] lo2-M user2018 00008648 890.LMD : FL3 Log - ADC

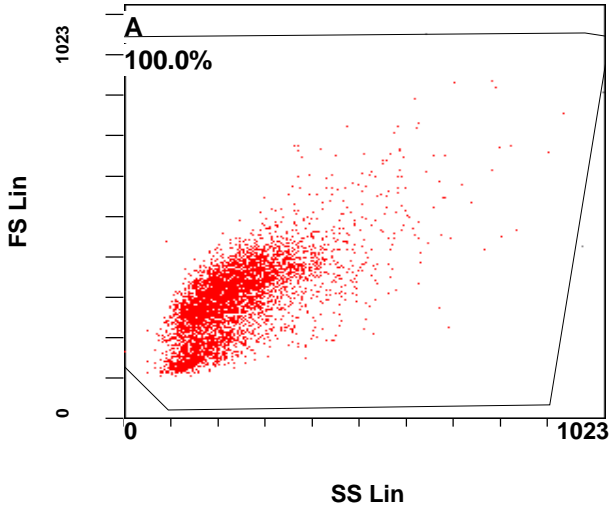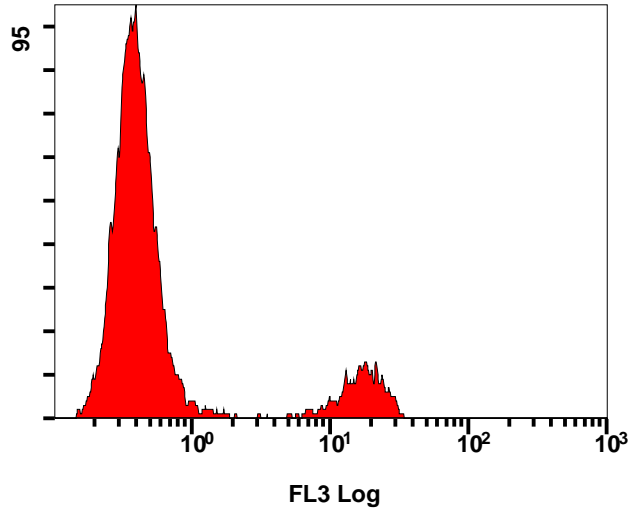

(F1)[A] lo2-M user2018 00008648 890.LMD : FL1 Log - A (F1)[A] lo2-M user2018 00008648 890.LMD : FL1 Log/FL3 Log - ADC

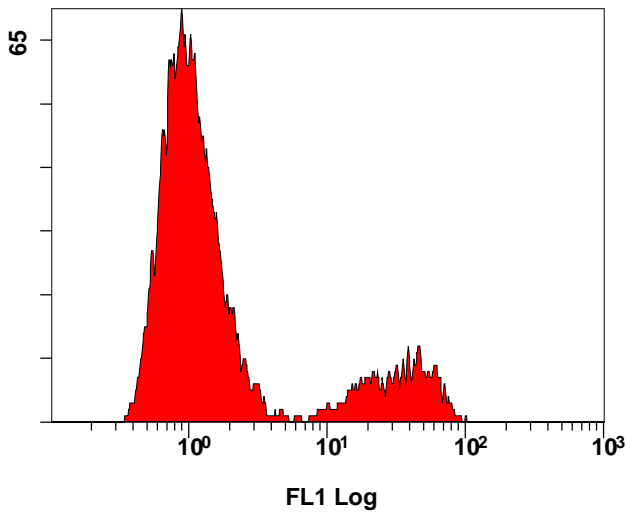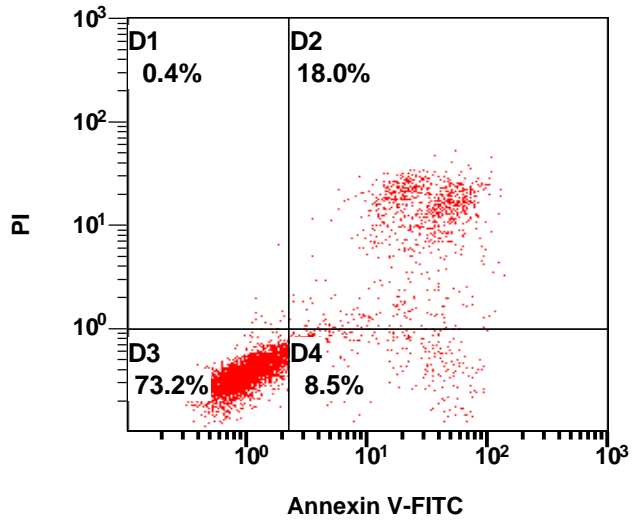

Institution: FC500  
Protocol: p i user2018 00008640 882.PRO  
Listmode Replay: Runtime Protocol  
Analysis Date: 19-Nov-2019, 17:09:21  
Settings File: PC9\_Annexin V-Pi.PRO, 19-Nov-2019, 16:11:55  
Listmode File: LO2-25 user2018 00008649 891.LMD

Run Date: 19-Nov-19, 16:12:49  
Sample ID: LO2-25  
User ID: user2018  
Acquisition Time/Events: 20.3s / 10000 (PROTOCOL)  
Instrument SN: AM18110 Software Version: CXP 2.3

(F1)[Ungated] LO2-25 user2018 00008649 891.LMD : SS Lin/FS (F1)[A]LO2-25 user2018 00008649 891.LMD : FL3 Log - ADC

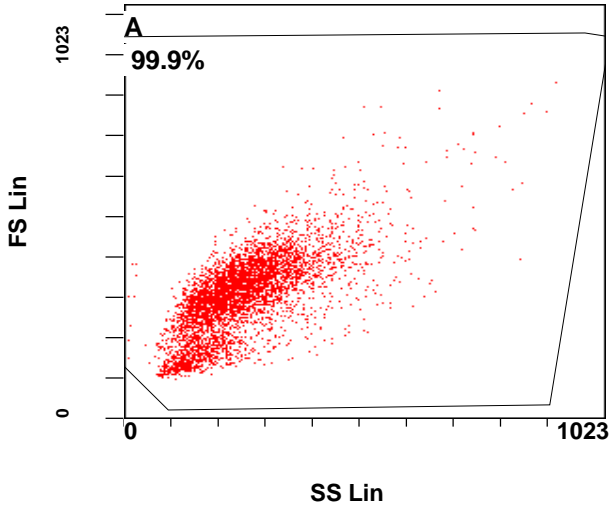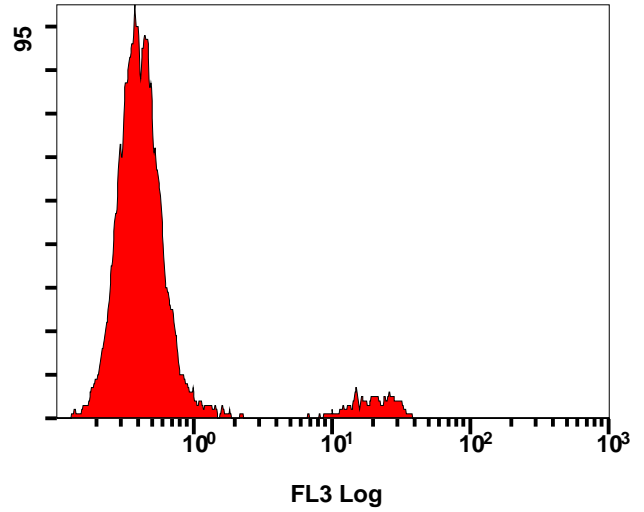

(F1)[A] LO2-25 user2018 00008649 891.LMD : FL1 Lo

LO2-25 user2018 00008649 891.LMD : FL1 Log/FL3 Log - ADC

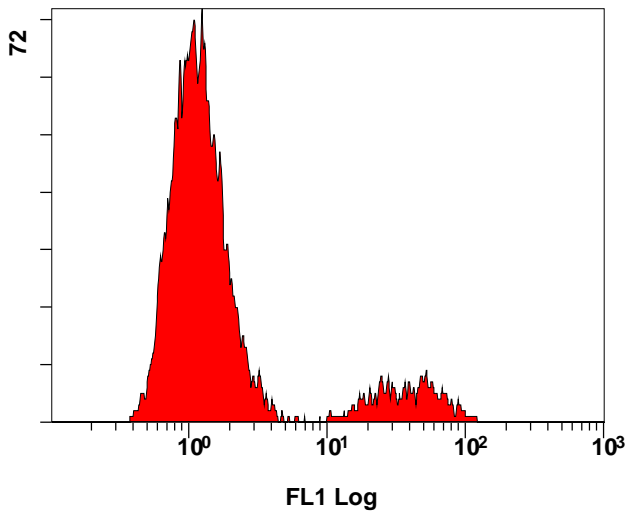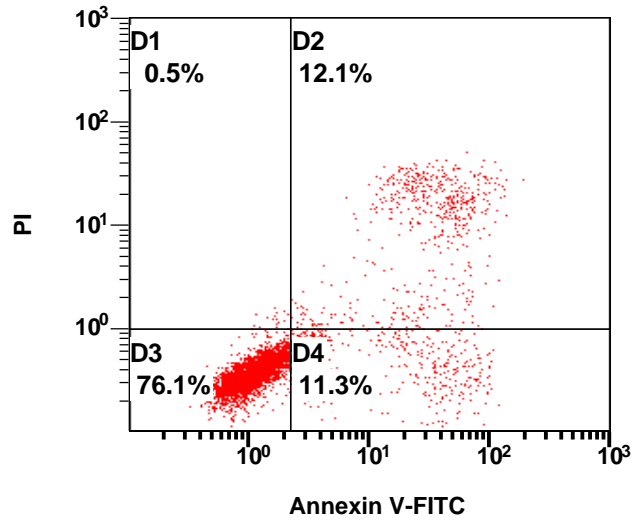

Institution: FC500  
Protocol: p i user2018 00008640 882.PRO  
Listmode Replay: Runtime Protocol  
Analysis Date: 19-Nov-2019, 17:10:20  
Settings File: PC9\_Annexin V-Pi.PRO, 19-Nov-2019, 16:14:16  
Listmode File: LO2-50 user2018 00008651 893.LMD

Run Date: 19-Nov-19, 16:15:02  
Sample ID: LO2-50  
User ID: user2018  
Acquisition Time/Events: 16.5s / 10000 (PROTOCOL)  
Instrument SN: AM18110 Software Version: CXP 2.3

(F1)[Ungated] LO2-50 user2018 00008651 893.LMD : SS Lin/FS L (F1)[A] LO2-50 user2018 00008651 893.LMD : FL3 Log - ADC

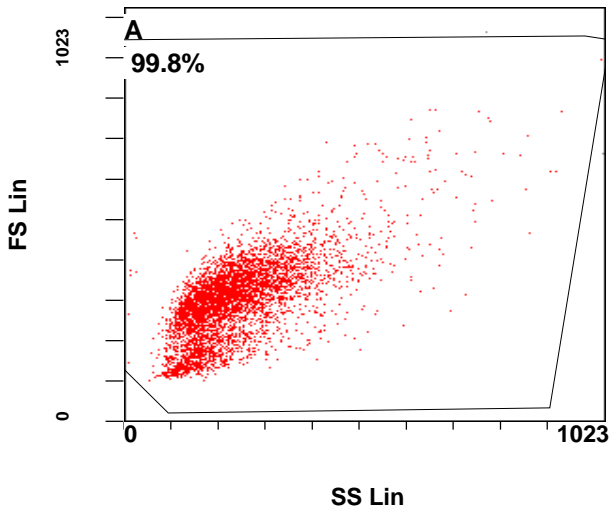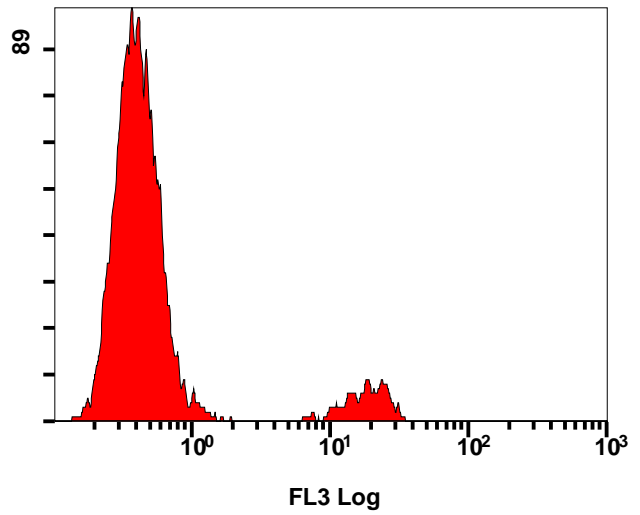

(F1)[A] LO2-50 user2018 00008651 893.LMD : FL1 Log - (F1)[A] LO2-50 user2018 00008651 893.LMD : FL1 Log/FL3 Log - ADC

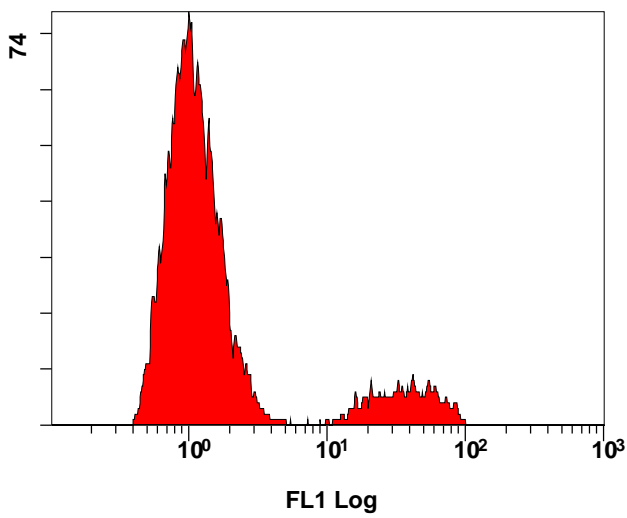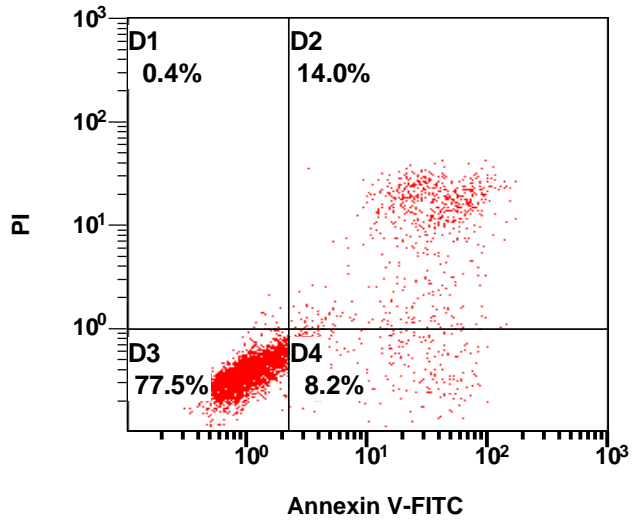



Institution: FC500  
Protocol: p i user2018 00008640 882.PRO  
Listmode Replay: Runtime Protocol  
Analysis Date: 19-Nov-2019, 17:09:50  
Settings File: PC9\_Annexin V-Pi.PRO, 19-Nov-2019, 16:13:10  
Listmode File: LO2-100 user2018 00008650 892.LMD

Run Date: 19-Nov-19, 16:13:59  
Sample ID: LO2-100  
User ID: user2018  
Acquisition Time/Events: 16.6s / 10000 (PROTOCOL)  
Instrument SN: AM18110 Software Version: CXP 2.3

(F1)[Ungated] LO2-100 user2018 00008650 892.LMD : SS Lin/FS | (F1)[A] LO2-100 user2018 00008650 892.LMD : FL3 Log - ADC

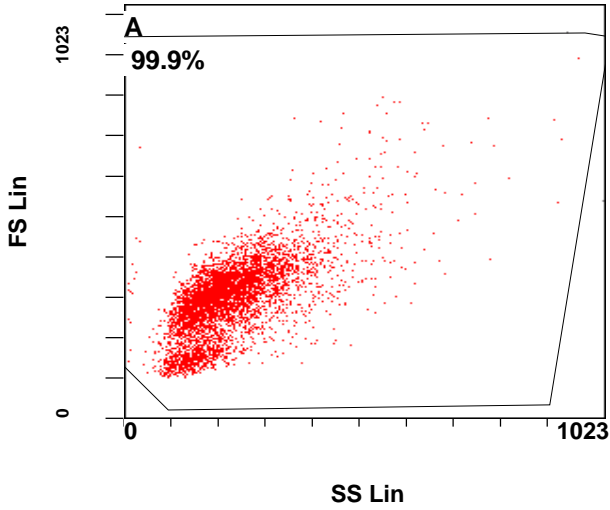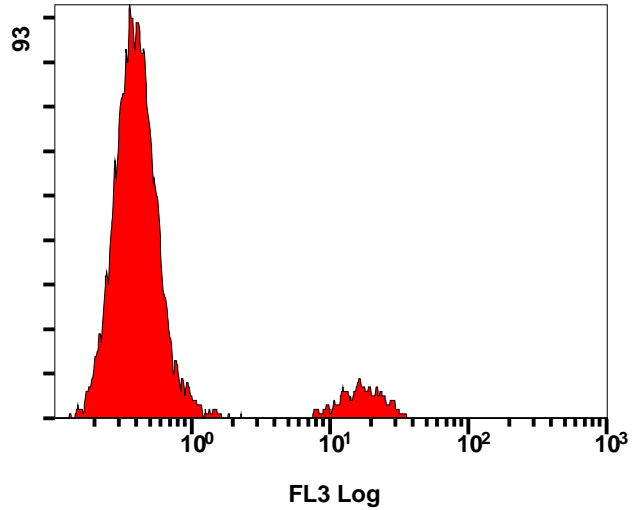

(F1)[A] LO2-100 user2018 00008650 892.LMD : FL1 Log -(F1)[A] LO2-100 user2018 00008650 892.LMD : FL1 Log/FL3 Log - ADC

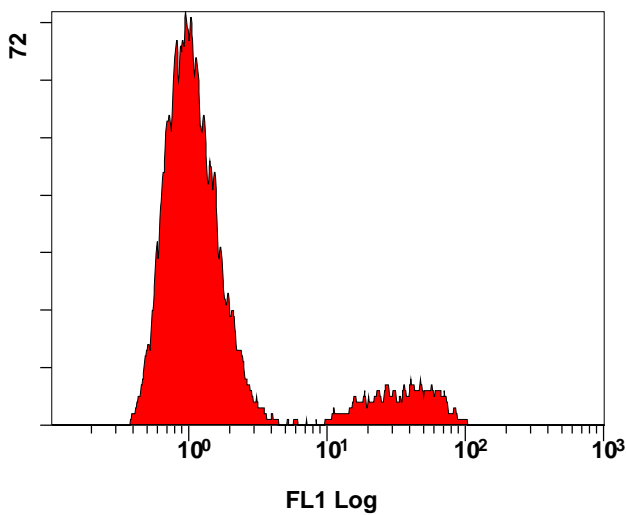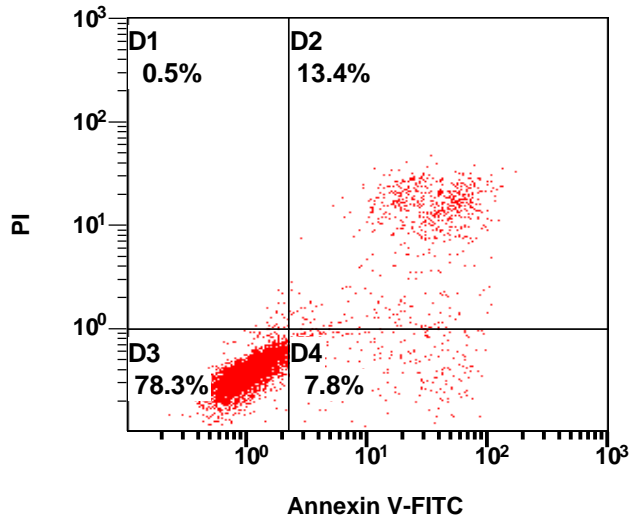

Institution: FC500  
 Protocol: LO2-50 user2018 00008652 894.PRO  
 Listmode Replay: New Protocol  
 Analysis Date: 29-Nov-2019, 15:30:32  
 Settings File: PC9\_Annexin V-Pi.PRO, 19-Nov-2019, 16:09:34  
 Listmode File: lo2-C user2018 00008647 889.LMD

Run Date: 19-Nov-19, 16:10:29  
 Sample ID: lo2-C  
 User ID: user2018  
 Acquisition Time/Events: 15.4s / 10000 (PROTOCOL)  
 Instrument SN: AM18110 Software Version: CXP 2.3

(F1)[Ungated] lo2-C user2018 00008647 889.LMD : SS Lin/FS Li

(F1)[A] lo2-C user2018 00008647 889.LMD : FL3 Log - ADC

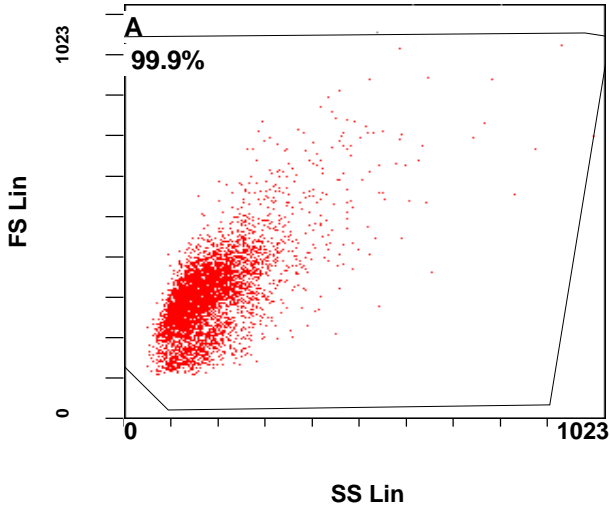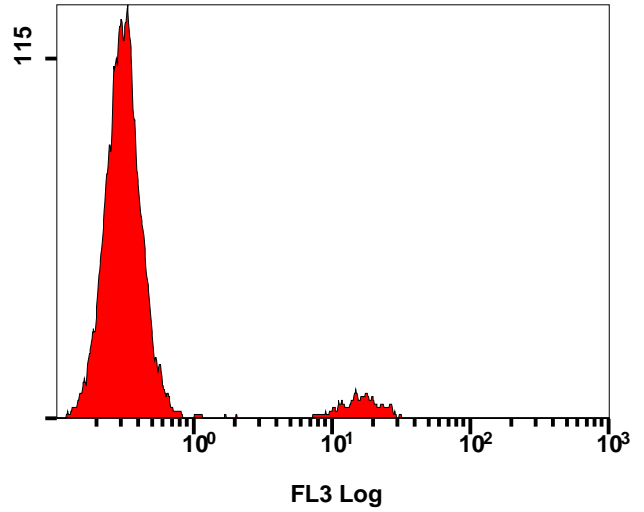

(F1)[A] lo2-C user2018 00008647 889.LMD : FL1 Log - AC

(F1)[A] lo2-C user2018 00008647 889.LMD : FL1 Log/FL3 Log - ADC

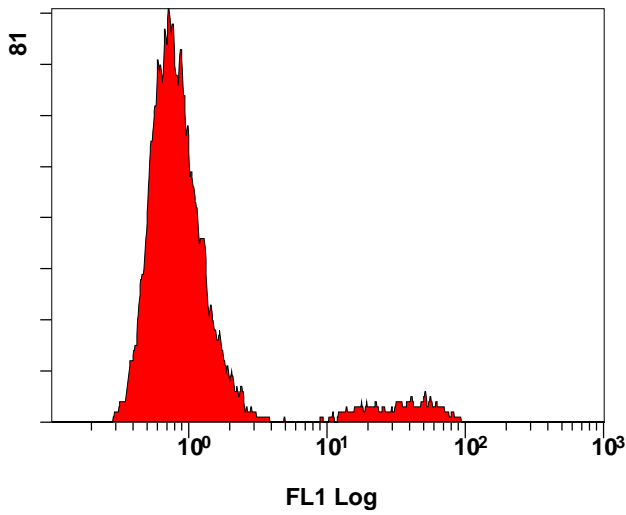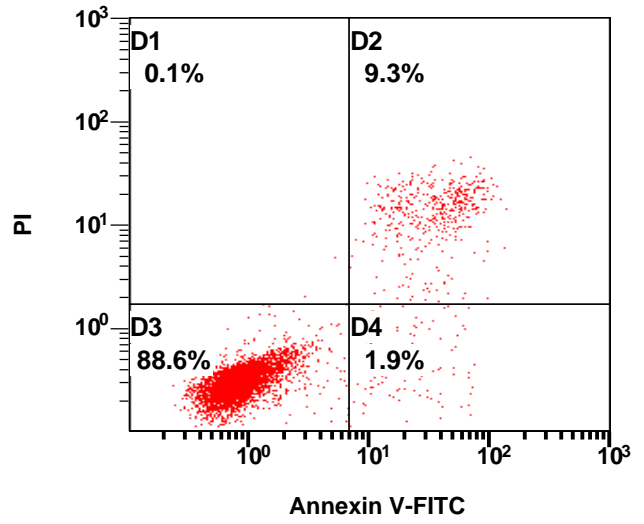

Institution: FC500  
Protocol: LO2-50 user2018 00008652 894.PRO  
Listmode Replay: New Protocol  
Analysis Date: 29-Nov-2019, 15:31:08  
Settings File: PC9\_Annexin V-Pi.PRO, 19-Nov-2019, 16:10:44  
Listmode File: lo2-M user2018 00008648 890.LMD

Run Date: 19-Nov-19, 16:11:36  
Sample ID: lo2-M  
User ID: user2018  
Acquisition Time/Events: 18.2s / 10000 (PROTOCOL)  
Instrument SN: AM18110 Software Version: CXP 2.3

(F1)[Ungated] lo2-M user2018 00008648 890.LMD : SS Lin/FS Li

(F1)[A] lo2-M user2018 00008648 890.LMD : FL3 Log - ADC



(F1)[A] lo2-M user2018 00008648 890.LMD : FL1 Log - A

(F1)[A] lo2-M user2018 00008648 890.LMD : FL1 Log/FL3 Log - ADC

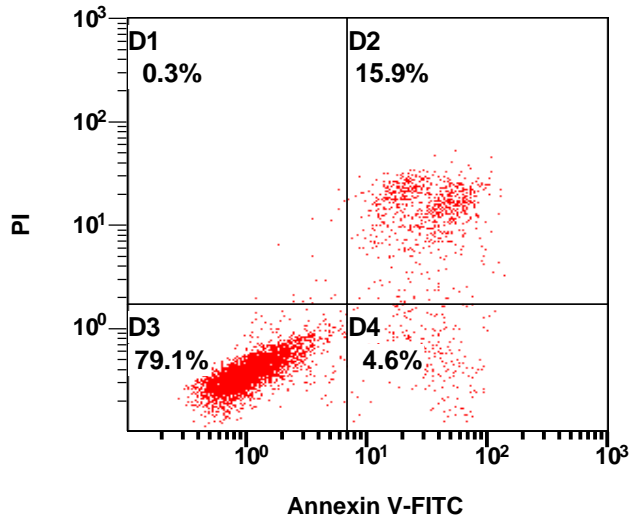

Institution: FC500  
Protocol: LO2-50 user2018 00008652 894.PRO  
Listmode Replay: New Protocol  
Analysis Date: 29-Nov-2019, 15:32:18  
Settings File: PC9\_Annexin V-Pi.PRO, 19-Nov-2019, 16:16:42  
Listmode File: LO2-25 user2018 00008653 895.LMD

Run Date: 19-Nov-19, 16:17:25  
Sample ID: LO2-25  
User ID: user2018  
Acquisition Time/Events: 18.7s / 10000 (PROTOCOL)  
Instrument SN: AM18110 Software Version: CXP 2.3

(F1)[Ungated] LO2-25 user2018 00008653 895.LMD : SS Lin/FS L (F1)[A] LO2-25 user2018 00008653 895.LMD : FL3 Log - ADC

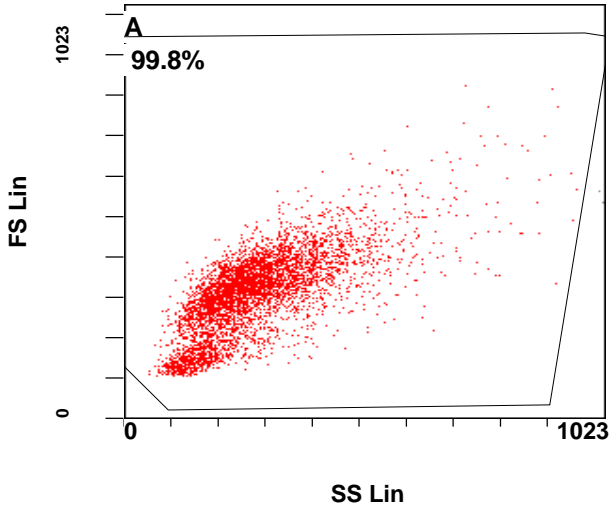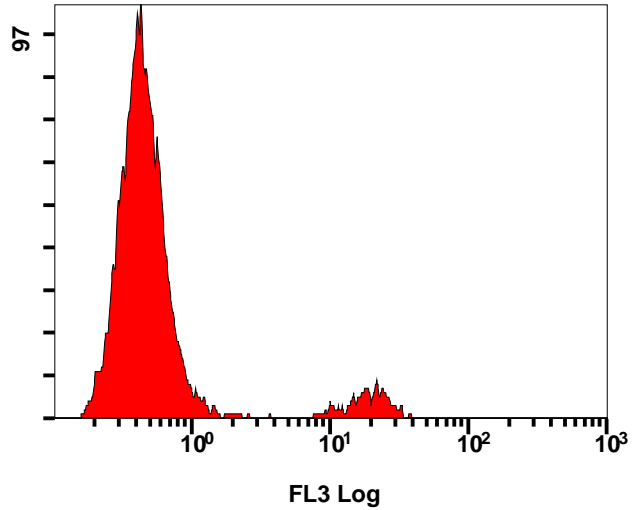

(F1)[A] LO2-25 user2018 00008653 895.LMD : FL1 Log - (F1)[A] LO2-25 user2018 00008653 895.LMD : FL1 Log/FL3 Log - ADC

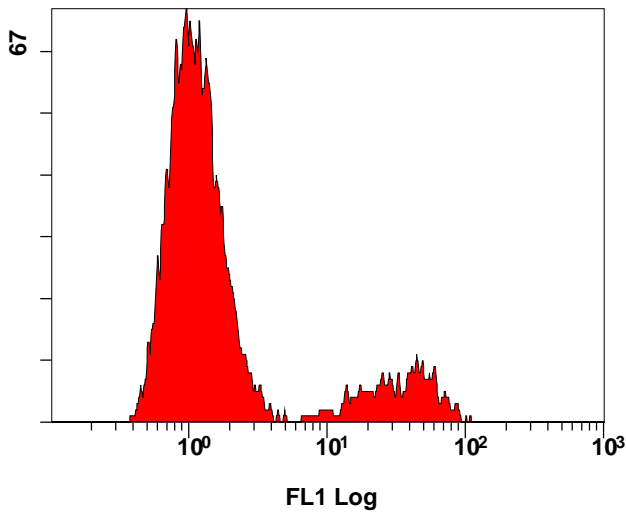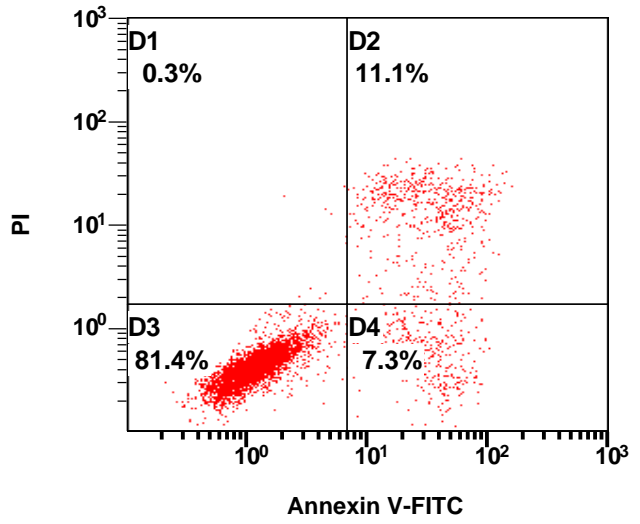

Institution: FC500  
 Protocol: LO2-50 user2018 00008652 894.PRO  
 Listmode Replay: New Protocol  
 Analysis Date: 29-Nov-2019, 15:33:22  
 Settings File: PC9\_Annexin V-Pi.PRO, 19-Nov-2019, 16:14:16  
 Listmode File: LO2-50 user2018 00008651 893.LMD

Run Date: 19-Nov-19, 16:15:02  
 Sample ID: LO2-50  
 User ID: user2018  
 Acquisition Time/Events: 16.5s / 10000 (PROTOCOL)  
 Instrument SN: AM18110 Software Version: CXP 2.3

(F1)[Ungated] LO2-50 user2018 00008651 893.LMD : SS Lin/FS L (F1)[A] LO2-50 user2018 00008651 893.LMD : FL3 Log - ADC

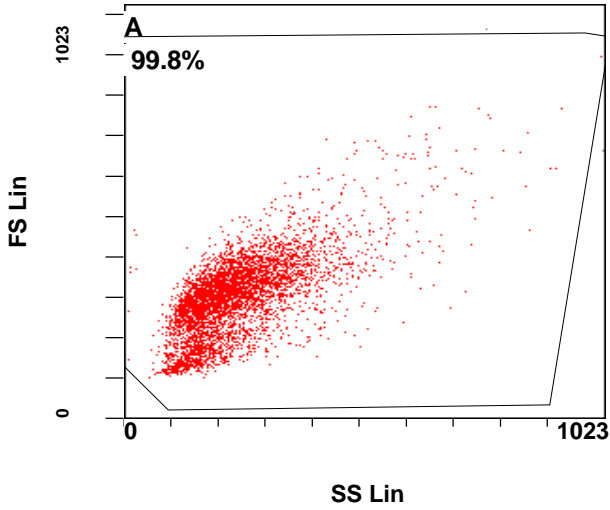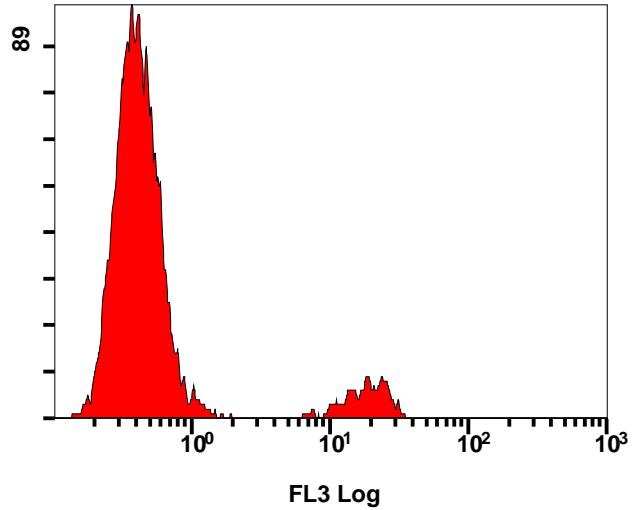

(F1)[A] LO2-50 user2018 00008651 893.LMD : FL1 Log - (F1)[A] LO2-50 user2018 00008651 893.LMD : FL1 Log/FL3 Log - ADC

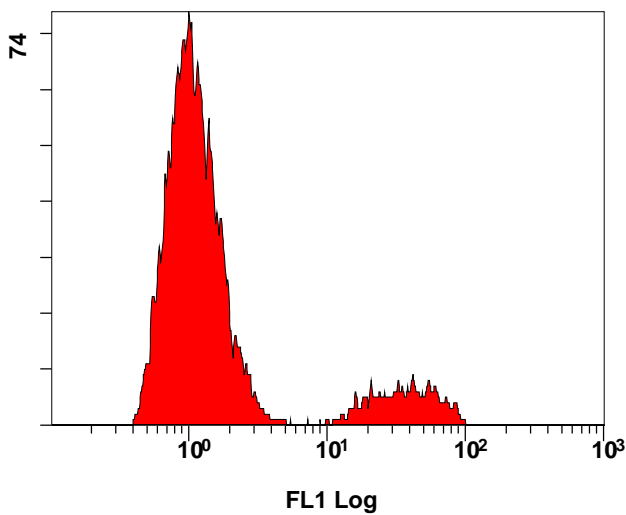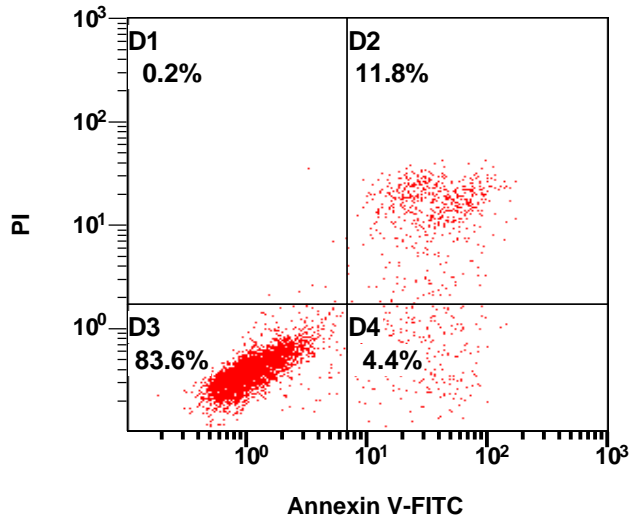

Institution: FC500  
 Protocol: LO2-50 user2018 00008652 894.PRO  
 Listmode Replay: New Protocol  
 Analysis Date: 29-Nov-2019, 15:33:04  
 Settings File: PC9\_Annexin V-Pi.PRO, 19-Nov-2019, 16:13:10  
 Listmode File: LO2-100 user2018 00008650 892.LMD

Run Date: 19-Nov-19, 16:13:59  
 Sample ID: LO2-100  
 User ID: user2018  
 Acquisition Time/Events: 16.6s / 10000 (PROTOCOL)  
 Instrument SN: AM18110 Software Version: CXP 2.3

(F1)[Ungated] LO2-100 user2018 00008650 892.LMD : SS Lin/FS | (F1)[A] LO2-100 user2018 00008650 892.LMD : FL3 Log - ADC

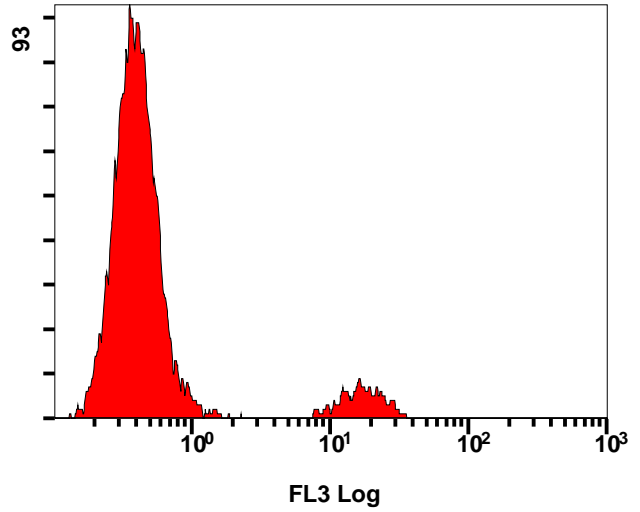

(F1)[A] LO2-100 user2018 00008650 892.LMD : FL1 Log -(F1)[A] LO2-100 user2018 00008650 892.LMD : FL1 Log/FL3 Log - ADC

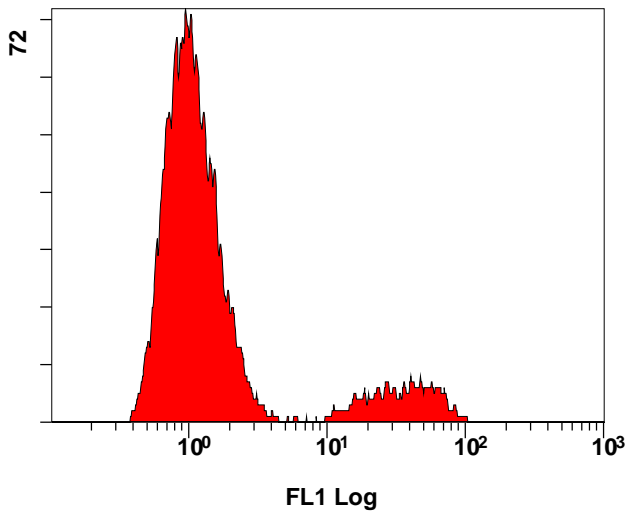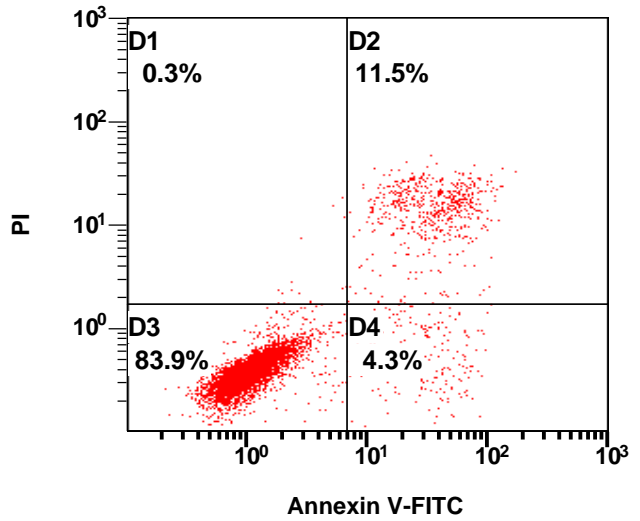



# 标本1 报告

标本名: 标本1

检验时间: 2019/12/5 13:05

仪器: NovoCyte Quanteon 622190610647

软件: NovoExpress 1.4.0

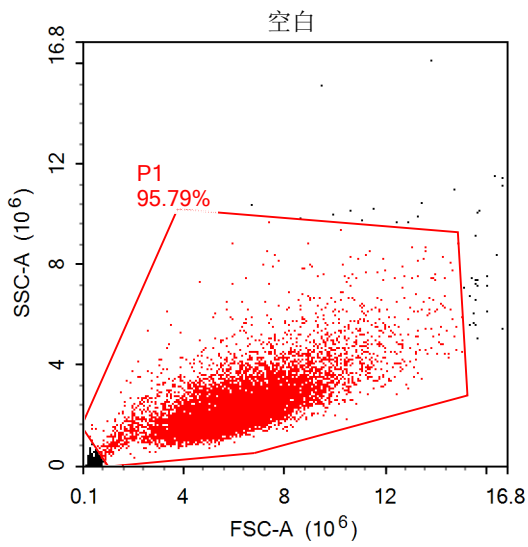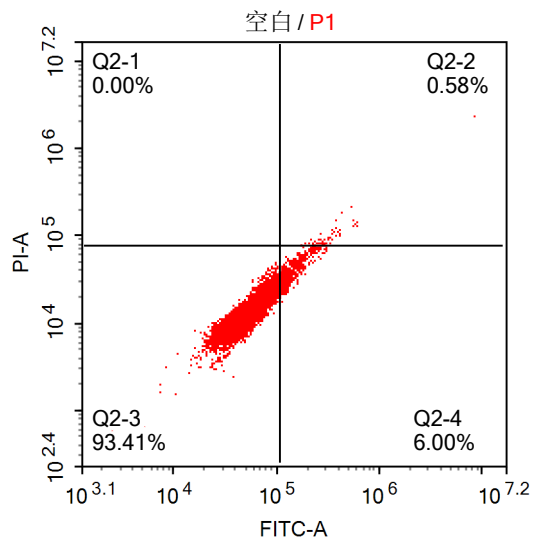

样本统计表格 - 空白

| Gate    | Count  | % Parent | X      | Y     | Median X  | Median Y  |
|---------|--------|----------|--------|-------|-----------|-----------|
| All     | 10,000 |          |        |       |           |           |
| └ P1    | 9,579  | 95.79%   | FSC-A  | SSC-A | 6,015,682 | 2,233,237 |
| └└ Q2-1 | 0      | 0.00%    | FITC-A | PI-A  | 0         | 0         |
| └└ Q2-2 | 56     | 0.58%    | FITC-A | PI-A  | 294,045   | 90,263    |
| └└ Q2-3 | 8,948  | 93.41%   | FITC-A | PI-A  | 53,823    | 13,921    |
| └└ Q2-4 | 575    | 6.00%    | FITC-A | PI-A  | 130,250   | 37,521    |

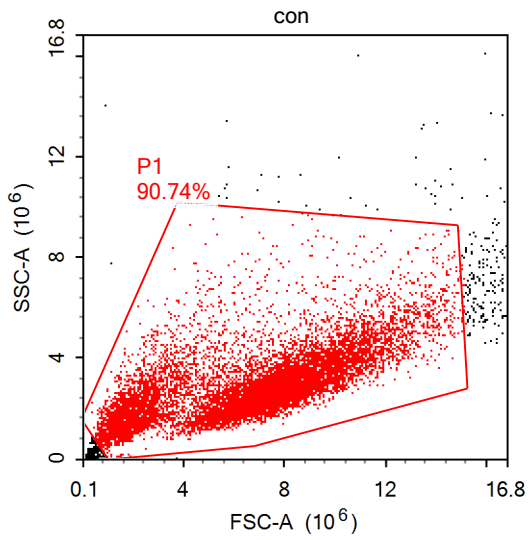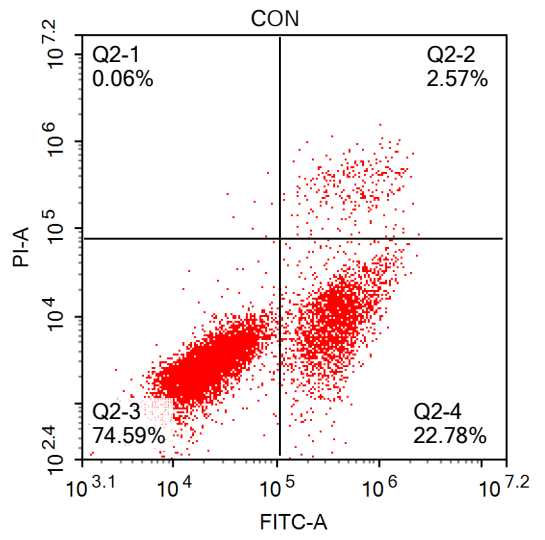

样本统计表格 - con

| Gate      | Count  | % Parent | X      | Y     | Median X  | Median Y  |
|-----------|--------|----------|--------|-------|-----------|-----------|
| All       | 11,755 |          |        |       |           |           |
| └─ P1     | 10,667 | 90.74%   | FSC-A  | SSC-A | 6,949,314 | 2,746,007 |
| └─┬─ Q2-1 | 7      | 0.06%    | FITC-A | PI-A  | 60,062    | 195,317   |
| └─┬─ Q2-2 | 274    | 2.57%    | FITC-A | PI-A  | 580,584   | 328,866   |
| └─┬─ Q2-3 | 7,956  | 74.59%   | FITC-A | PI-A  | 22,069    | 2,861     |
| └─┬─ Q2-4 | 2,430  | 22.78%   | FITC-A | PI-A  | 368,716   | 9,315     |

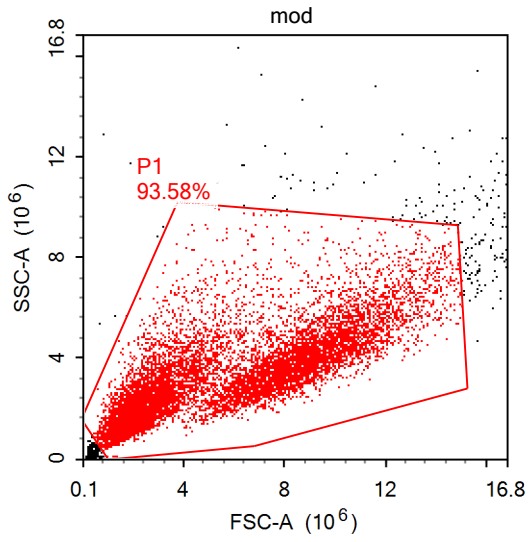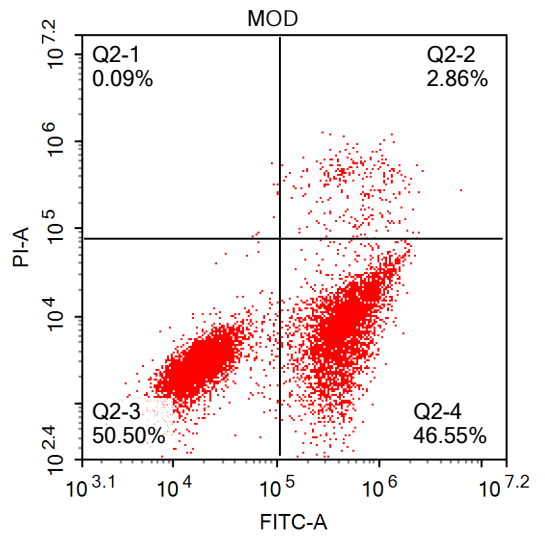

样本统计表格 - mod

| Gate    | Count  | % Parent | X      | Y     | Median X  | Median Y  |
|---------|--------|----------|--------|-------|-----------|-----------|
| All     | 10,686 |          |        |       |           |           |
| └─ P1   | 10,000 | 93.58%   | FSC-A  | SSC-A | 5,523,292 | 3,228,400 |
| └─ Q2-1 | 9      | 0.09%    | FITC-A | PI-A  | 93,400    | 251,878   |
| └─ Q2-2 | 286    | 2.86%    | FITC-A | PI-A  | 601,001   | 359,940   |
| └─ Q2-3 | 5,050  | 50.50%   | FITC-A | PI-A  | 17,696    | 2,753     |
| └─ Q2-4 | 4,655  | 46.55%   | FITC-A | PI-A  | 447,161   | 7,840     |

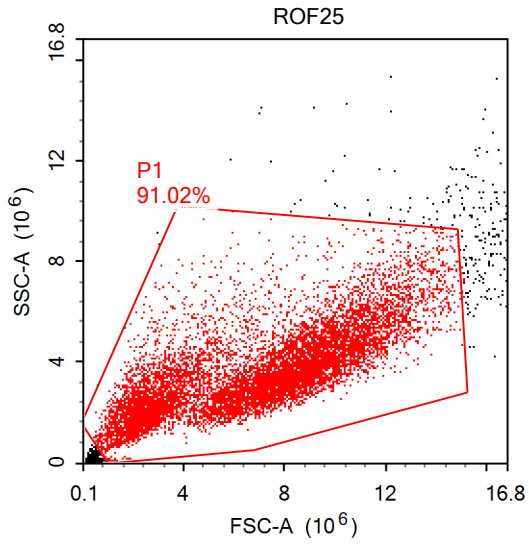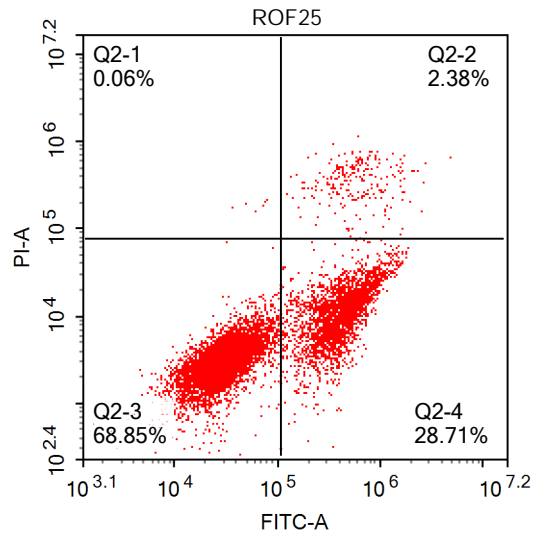

样本统计表格 - ROF25

| Gate      | Count  | % Parent | X      | Y     | Median X  | Median Y  |
|-----------|--------|----------|--------|-------|-----------|-----------|
| All       | 10,986 |          |        |       |           |           |
| └─ P1     | 10,000 | 91.02%   | FSC-A  | SSC-A | 7,368,979 | 3,472,919 |
| └─┬─ Q2-1 | 6      | 0.06%    | FITC-A | PI-A  | 65,896    | 187,018   |
| └─┬─ Q2-2 | 238    | 2.38%    | FITC-A | PI-A  | 563,421   | 375,826   |
| └─┬─ Q2-3 | 6,885  | 68.85%   | FITC-A | PI-A  | 29,442    | 3,088     |
| └─┬─ Q2-4 | 2,871  | 28.71%   | FITC-A | PI-A  | 405,093   | 11,118    |

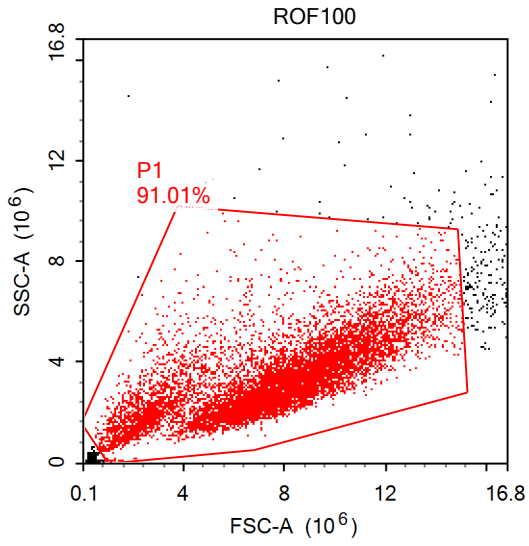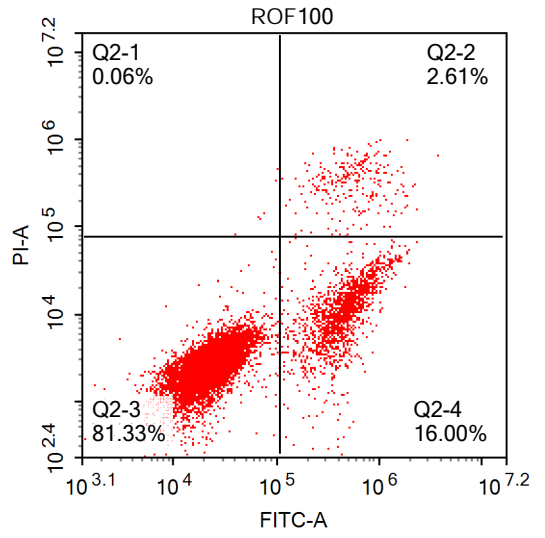

样本统计表格 - ROF100

| Gate      | Count  | % Parent | X      | Y     | Median X  | Median Y  |
|-----------|--------|----------|--------|-------|-----------|-----------|
| All       | 10,988 |          |        |       |           |           |
| └─ P1     | 10,000 | 91.01%   | FSC-A  | SSC-A | 7,703,932 | 3,122,484 |
| └─┬─ Q2-1 | 6      | 0.06%    | FITC-A | PI-A  | 71,526    | 137,388   |
| └─┬─ Q2-2 | 261    | 2.61%    | FITC-A | PI-A  | 536,729   | 350,078   |
| └─┬─ Q2-3 | 8,133  | 81.33%   | FITC-A | PI-A  | 22,213    | 2,645     |
| └─┬─ Q2-4 | 1,600  | 16.00%   | FITC-A | PI-A  | 435,811   | 10,773    |

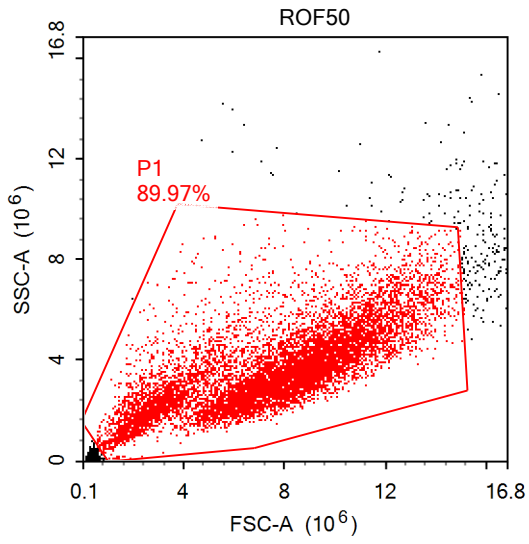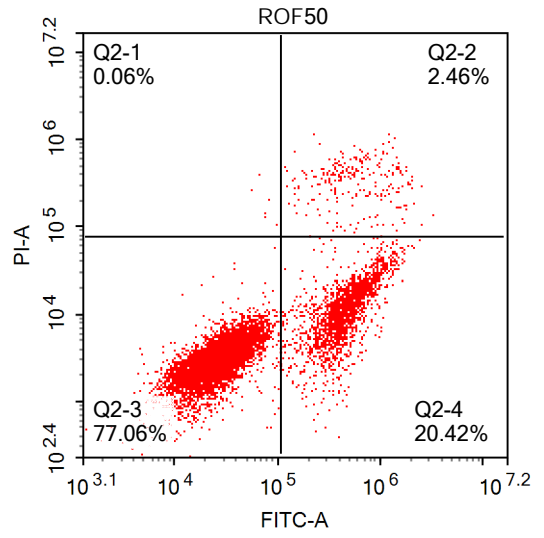

样本统计表格 - ROF50

| Gate      | Count  | % Parent | X      | Y     | Median X  | Median Y  |
|-----------|--------|----------|--------|-------|-----------|-----------|
| All       | 11,115 |          |        |       |           |           |
| └─ P1     | 10,000 | 89.97%   | FSC-A  | SSC-A | 7,875,686 | 3,476,606 |
| └─┬─ Q2-1 | 6      | 0.06%    | FITC-A | PI-A  | 75,701    | 174,744   |
| └─┬─ Q2-2 | 246    | 2.46%    | FITC-A | PI-A  | 540,603   | 371,285   |
| └─┬─ Q2-3 | 7,706  | 77.06%   | FITC-A | PI-A  | 26,291    | 3,126     |
| └─┬─ Q2-4 | 2,042  | 20.42%   | FITC-A | PI-A  | 458,609   | 12,447    |



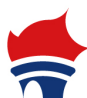

**EDITSPRINGS**

# EDITORIAL CERTIFICATE

This is to certify that the manuscript detailed below was edited by one or more of our highly qualified, native English speakers at EditSprings, to assure compliance with Anglophone academic standards in terms of style, punctuation, grammar, and spelling.

Manuscript title:

**Rhoifolin Alleviates Alcoholic Liver Disease in vivo and in vitro via  
Inhibition of the TLR4/NF- $\kappa$ B Signaling Pathway**

Authors:

**Mai Baoyu**

Date Issued:

**Mar 27 2022**

Certificate Number:

**ES-202203201651366647**

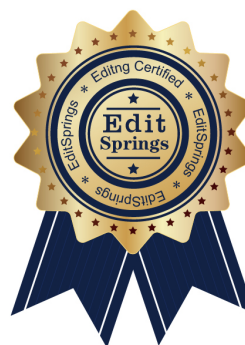

This certificate can be verified on <https://www.editsprings.cn/QueryCertificate.html> EditSprings hereby certifies that neither content nor the author's intentions were altered in any way during the editing process. Documents in receipt of this certification should be ready for publication as far as style and language are concerned, provided that the author(s) accepted our suggestions and changes (which remains their right and responsibility).

EditSprings offers a wide range of editing, translation, for researchers and publishers across the world. Our highly skilled editors are all established academics based in Anglophone Higher Education institutions across the world (U.K., U.S.A., Canada, Australia, and elsewhere), are experts in their respective fields, and are qualified to edit research papers authored by non-Anglophone scholars.
